# Supplementary material for: Global Burden of Geriatric Head and Neck Cancer: A Comprehensive Analysis of Epidemiology and Risk Factors from 1990 to 2021
Source: Research Square preprint supplement (doi:10.21203/rs.3.rs-7708012/v1), 2025-10-31
Supplement: Supplementary file 1 [file 369f04d5d6c318e64db1ea4f.docx]

**Table S1 Global incident, prevalent, DALYs and death cases for HNC in 1990 and 2021 and percentage change of age-standardized rates**

| Global Burden | HNC | Number of cases,1990 | Age-standardized  rate per 100 000  population, 1990 | Number of cases,2021 | Age-standardized  rate per 100 000  population, 2021 | Estimated annual  percentage change,  1990–2021 | AAPC |
| --- | --- | --- | --- | --- | --- | --- | --- |
| Incidence | Total | 440037 (415928, 465751) | 10.63 (10.04, 11.24) | 911158 (841503, 981468) | 10.49 (9.69, 11.30) | -0.15 (-0.24, -0.05) | 0.00 (-0.00, 0.00) |
|  | Nasopharynx cancer | 76256 (68714, 83570) | 1.74 (1.56, 1.90) | 118878 (104836, 135884) | 1.38 (1.22, 1.58) | -1.06 (-1.28, -0.84) | -0.01 (-0.01, -0.01) |
|  | Lip and oral cavity cancer | 174077 (167404, 181622) | 4.27 (4.10, 4.45) | 421577 (389879, 449782) | 4.88 (4.52, 5.20) | 0.40 (0.33, 0.46) | 0.02 (0.02, 0.02) |
|  | Larynx cancer | 125175 (118981, 131639) | 3.07 (2.92, 3.23) | 200883 (186941, 216098) | 2.29 (2.13, 2.47) | -1.09 (-1.16, -1.01) | -0.02 (-0.03, -0.02) |
|  | Other pharynx cancer | 64529 (60829, 68920) | 1.55 (1.46, 1.66) | 169820 (159847, 179704) | 1.93 (1.82, 2.05) | 0.68 (0.60, 0.75) | 0.01 (0.01, 0.01) |
| Prevalence | Total | 1560230 (1483668, 1637142) | 36.89 (35.07, 38.70) | 3495159 (3237885, 3778012) | 40.12 (37.16, 43.35) | 0.21 (0.13, 0.28) | 0.10 (0.10, 0.11) |
|  | Nasopharynx cancer | 252931 (227867, 276503) | 5.56 (5.02, 6.09) | 525219 (455884, 613340) | 6.14 (5.34, 7.16) | 0.07 (-0.15, 0.29) | 0.02 (0.02, 0.02) |
|  | Lip and oral cavity cancer | 587479 (568848, 605472) | 13.89 (13.44, 14.31) | 1538008 (1435014, 1633910) | 17.71 (16.52, 18.81) | 0.82 (0.76, 0.87) | 0.12 (0.12, 0.13) |
|  | Larynx cancer | 628532 (598814, 660379) | 15.27 (14.54, 16.06) | 1103684 (1033145, 1186560) | 12.56 (11.76, 13.49) | -0.76 (-0.82, -0.70) | -0.09 (-0.09, -0.09) |
|  | Other pharynx cancer | 91288 (88139, 94788) | 2.16 (2.08, 2.24) | 328249 (313842, 344202) | 3.72 (3.55, 3.90) | 1.84 (1.75, 1.93) | 0.05 (0.05, 0.05) |
| DALYs | Total | 9146353 (8503579, 9811894) | 213.09 (198.30, 228.51) | 14351351 (13086035, 15572679) | 164.80 (150.16, 178.82) | -1.00 (-1.11, -0.90) | -1.53 (-1.57, -1.50) |
|  | Nasopharynx cancer | 2361827 (2125353, 2588450) | 52.22 (46.99, 57.28) | 2490191 (2213998, 2778564) | 28.91 (25.69, 32.24) | -2.29 (-2.49, -2.09) | -0.78 (-0.79, -0.76) |
|  | Lip and oral cavity cancer | 2936205 (2793741, 3092058) | 69.27 (65.92, 72.96) | 5874070 (5326986, 6347557) | 67.71 (61.32, 73.17) | -0.16 (-0.22, -0.11) | -0.05 (-0.06, -0.03) |
|  | Larynx cancer | 2475842 (2313814, 2636993) | 59.30 (55.47, 63.10) | 3143309 (2922792, 3383514) | 35.80 (33.29, 38.54) | -1.82 (-1.90, -1.73) | -0.75 (-0.77, -0.74) |
|  | Other pharynx cancer | 1372478 (1270671, 1494393) | 32.30 (29.92, 35.17) | 2843781 (2622259, 3063043) | 32.38 (29.85, 34.87) | -0.09 (-0.16, -0.01) | 0.02 (0.00, 0.03) |
| Deaths | Total | 292469 (272453, 312855) | 7.20 (6.71, 7.70) | 499425 (459725, 539306) | 5.77 (5.31, 6.23) | -0.87 (-0.96, -0.77) | -0.04 (-0.05, -0.04) |
|  | Nasopharynx cancer | 64933 (58545, 71096) | 1.52 (1.37, 1.66) | 75359 (67515, 83706) | 0.87 (0.78, 0.97) | -2.17 (-2.37, -1.98) | -0.02 (-0.02, -0.02) |
|  | Lip and oral cavity cancer | 97402 (92506, 102361) | 2.45 (2.33, 2.58) | 208379 (191288, 224162) | 2.42 (2.23, 2.60) | -0.11 (-0.17, -0.06) | -0.11 (-0.17, -0.06) |
|  | Larynx cancer | 85790 (80409, 91208) | 2.15 (2.01, 2.28) | 117252 (109355, 125952) | 1.35 (1.26, 1.45) | -1.66 (-1.74, -1.58) | -0.03 (-0.03, -0.03) |
|  | Other pharynx cancer | 44344 (40994, 48190) | 1.08 (1.00, 1.18) | 98435 (91567, 105485) | 1.13 (1.05, 1.21) | 0.06 (-0.02, 0.14) | 0.00 (0.00, 0.00) |

**Table S2** **Incident ,prevalent, DALYs and death cases for Geriatric HNC in 1990 and 2021 and percentage change of age-standardized rates by Global Burden of Disease (GBD) region**

|  |  | Incidence |  |  |  |  |  | Prevalence |  |  |  |  |  | DALYs |  |  |  |  |  | Death |  |  |  |  |  |
| --- | --- | --- | --- | --- | --- | --- | --- | --- | --- | --- | --- | --- | --- | --- | --- | --- | --- | --- | --- | --- | --- | --- | --- | --- | --- |
|  | Location | Number of cases,1990 | Age-standardized  rate per 100 000  population, 1990 | Number of cases,2021 | Age-standardized  rate per 100 000  population, 2021 | Estimated annual  percentage change,  1990–2021 | AAPCs_95CI | Number of cases,1990 | Age-standardized  rate per 100 000  population, 1990 | Number of cases,2021 | Age-standardized  rate per 100 000  population, 2021 | Estimated annual  percentage change,  1990–2021 | AAPCs_95CI | Number of cases,1990 | Age-standardized  rate per 100 000  population, 1990 | Number of cases,2021 | Age-standardized  rate per 100 000  population, 2021 | Estimated annual  percentage change,  1990–2021 | AAPCs_95CI | Number of cases,1990 | Age-standardized  rate per 100 000  population, 1990 | Number of cases,2021 | Age-standardized  rate per 100 000  population, 2021 | Estimated annual  percentage change,  1990–2021 | AAPCs_95CI |
| HNC |  |  |  |  |  |  |  |  |  |  |  |  |  |  |  |  |  |  |  |  |  |  |  |  |  |
| 1 | Global | 224523 (209794, 238664) | 46.29 (43.11, 49.24) | 521515 (475048, 563645) | 47.96 (43.60, 51.85) | 0.26 (0.18, 0.34) | 0.07(0.06,0.08) | 725440 (682256, 768593) | 146.20 (137.12, 155.16) | 1797337 (1650786, 1936920) | 163.77 (150.23, 176.52) | 0.70 (0.62, 0.78) | 0.57(0.54,0.60) | 3604564 (3334140, 3879505) | 723.39 (668.17, 778.66) | 6697338 (6089293, 7280934) | 610.39 (554.47, 663.63) | -0.48 (-0.56, -0.40) | -3.47(-3.62,-3.31) | 161407 (148889, 173757) | 33.90 (31.18, 36.52) | 315433 (285135, 343116) | 29.24 (26.39, 31.82) | -0.39 (-0.47, -0.31) | -0.14(-0.15,-0.13) |
| 2 | Male | 167308 (155171, 180151) | 77.25 (71.45, 83.21) | 380270 (344004, 415579) | 75.89 (68.51, 82.92) | 0.04 (-0.05, 0.13) |  | 552031 (516255, 590467) | 246.61 (229.78, 264.51) | 1323426 (1207257, 1441160) | 259.03 (235.99, 282.02) | 0.33 (0.25, 0.41) |  | 2756394 (2521449, 3019734) | 1218.81 (1113.74, 1334.69) | 5032498 (4516549, 5556592) | 983.31 (881.93, 1085.20) | -0.70 (-0.79, -0.61) |  | 121004 (110513, 132400) | 57.70 (52.59, 63.12) | 231587 (207700, 255221) | 47.13 (42.20, 51.91) | -0.61 (-0.69, -0.52) |  |
| 3 | Female | 57215 (50791, 62562) | 21.66 (19.18, 23.70) | 141246 (122108, 158487) | 24.06 (20.81, 26.99) | -0.13 (-0.23, -0.03) |  | 173409 (156509, 186769) | 64.39 (58.00, 69.42) | 473911 (416358, 523727) | 80.86 (71.05, 89.35) | 0.13 (0.04, 0.21) |  | 848170 (734305, 948719) | 315.83 (273.18, 353.24) | 1664841 (1444862, 1903072) | 284.16 (246.70, 324.80) | -0.84 (-0.94, -0.75) |  | 40403 (34935, 45091) | 15.51 (13.38, 17.31) | 83845 (71679, 95834) | 14.26 (12.20, 16.30) | -0.78 (-0.87, -0.70) |  |
| 4 | High SDI | 76312 (71744, 80241) | 52.97 (49.76, 55.72) | 152348 (137984, 163208) | 55.28 (50.41, 59.08) | 0.14 (0.07, 0.22) | 0.08(0.06,0.11) | 322341 (303821, 340594) | 223.68 (210.89, 236.37) | 674000 (618967, 717469) | 250.28 (230.78, 266.04) | 0.39 (0.34, 0.44) | 0.87(0.79,0.96) | 764479 (722076, 803416) | 533.09 (503.19, 560.42) | 1122849 (1027413, 1200401) | 414.33 (381.24, 442.19) | -0.88 (-0.99, -0.77) | -3.88(-4.07,-3.69) | 35652 (33425, 37461) | 24.78 (23.19, 26.06) | 56682 (50756, 60856) | 19.87 (17.96, 21.27) | -0.77 (-0.88, -0.66) | -0.15(-0.16,-0.14) |
| 5 | High-middle SDI | 56383 (51899, 61167) | 44.58 (40.90, 48.41) | 110115 (96643, 124146) | 42.86 (37.59, 48.30) | -0.26 (-0.37, -0.15) | -0.04(-0.06,-0.02) | 186047 (171215, 202478) | 143.40 (131.64, 156.36) | 423481 (371331, 479296) | 163.82 (143.62, 185.33) | 0.37 (0.28, 0.47) | 0.70(0.65,0.76) | 944625 (866375, 1031269) | 728.32 (666.56, 795.70) | 1291227 (1140984, 1454352) | 500.53 (442.08, 563.63) | -1.47 (-1.58, -1.36) | -7.33(-7.61,-7.04) | 41892 (38321, 45751) | 33.95 (30.94, 37.12) | 60493 (53232, 68095) | 23.74 (20.86, 26.71) | -1.39 (-1.49, -1.28) | -0.33(-0.34,-0.31) |
| 6 | Middle SDI | 45863 (41213, 50420) | 39.08 (35.07, 42.96) | 135222 (118718, 152808) | 41.24 (36.14, 46.59) | 0.03 (-0.10, 0.16) | 0.07(0.06,0.09) | 117545 (105539, 129169) | 95.05 (85.25, 104.48) | 417473 (365976, 473165) | 123.69 (108.41, 140.10) | 0.76 (0.60, 0.91) | 0.95(0.90,0.99) | 918604 (822595, 1012941) | 745.20 (667.09, 821.28) | 1986065 (1756519, 2233819) | 593.53 (524.32, 667.33) | -0.94 (-1.05, -0.84) | -4.86(-5.02,-4.70) | 41139 (36849, 45328) | 36.28 (32.45, 39.96) | 93391 (82379, 105027) | 29.19 (25.68, 32.82) | -0.88 (-0.98, -0.79) | -0.23(-0.23,-0.22) |
| 7 | Low-middle SDI | 35519 (30014, 41601) | 51.11 (43.07, 59.93) | 99123 (86024, 113089) | 58.43 (50.65, 66.68) | 0.37 (0.29, 0.46) | 0.28(0.25,0.30) | 76439 (65254, 88724) | 105.64 (90.00, 122.75) | 226264 (199077, 256345) | 128.84 (113.32, 145.99) | 0.57 (0.45, 0.69) | 0.82(0.77,0.87) | 750753 (633072, 883429) | 1033.23 (869.77, 1216.38) | 1818641 (1577192, 2081503) | 1039.34 (900.93, 1189.58) | -0.03 (-0.09, 0.03) | 0.99(0.49,1.49) | 32917 (27693, 38740) | 48.70 (40.86, 57.38) | 83228 (72200, 95231) | 50.27 (43.55, 57.54) | 0.05 (-0.01, 0.11) | 0.09(0.07,0.12) |
| 8 | Low SDI | 10190 (8222, 12367) | 39.86 (32.18, 48.36) | 24194 (19952, 28985) | 43.61 (35.98, 52.15) | 0.20 (0.10, 0.31) | 0.14(0.12,0.16) | 22257 (18050, 26889) | 82.88 (67.23, 100.07) | 54302 (45514, 64242) | 93.29 (78.24, 110.24) | 0.28 (0.16, 0.40) | 0.37(0.34,0.40) | 221842 (179141, 270669) | 824.00 (665.65, 1004.83) | 471675 (388268, 566084) | 813.81 (670.50, 975.35) | -0.13 (-0.21, -0.05) | -0.11(-0.57,0.35) | 9613 (7769, 11731) | 38.80 (31.36, 47.32) | 21315 (17578, 25525) | 39.66 (32.74, 47.40) | 0.01 (-0.07, 0.10) | 0.05(0.03,0.07) |
| 9 | Andean Latin America | 400 (325, 490) | 17.33 (14.07, 21.22) | 1090 (822, 1424) | 15.31 (11.55, 19.98) | -0.44 (-0.66, -0.21) | -0.06(-0.08,-0.03) | 1002 (818, 1225) | 42.44 (34.64, 51.88) | 3208 (2406, 4230) | 44.64 (33.49, 58.82) | 0.11 (-0.13, 0.36) | 0.14(0.09,0.18) | 7525 (6132, 9222) | 319.35 (260.20, 391.36) | 15719 (11836, 20418) | 219.27 (165.20, 284.68) | -1.29 (-1.50, -1.07) | -2.91(-3.20,-2.61) | 376 (307, 461) | 16.55 (13.47, 20.29) | 823 (623, 1063) | 11.64 (8.81, 15.03) | -1.17 (-1.37, -0.98) | -0.14(-0.16,-0.13) |
| 10 | Australasia | 1929 (1616, 2290) | 62.16 (52.02, 73.80) | 4116 (3262, 5087) | 58.14 (46.12, 71.90) | -0.33 (-0.59, -0.08) | -0.20(-0.28,-0.13) | 8221 (6886, 9782) | 263.17 (220.33, 313.28) | 20507 (16317, 25348) | 294.71 (234.57, 364.41) | 0.28 (0.07, 0.48) | 0.95(0.56,1.35) | 16198 (13794, 18882) | 522.07 (444.18, 608.66) | 23010 (18787, 27753) | 328.08 (268.29, 395.78) | -1.62 (-1.87, -1.36) | -6.58(-6.88,-6.28) | 742 (633, 860) | 24.15 (20.57, 28.02) | 1170 (949, 1404) | 16.00 (13.00, 19.19) | -1.43 (-1.67, -1.18) | -0.28(-0.29,-0.26) |
| 11 | Caribbean | 1690 (1486, 1921) | 53.29 (46.80, 60.55) | 3479 (2853, 4194) | 51.79 (42.48, 62.44) | 0.11 (0.00, 0.22) | -0.04(-0.08,0.00) | 4795 (4215, 5466) | 148.22 (130.22, 168.97) | 11654 (9568, 14114) | 174.10 (142.90, 210.87) | 0.74 (0.65, 0.83) | 0.86(0.69,1.02) | 27096 (23923, 30832) | 845.10 (745.65, 961.72) | 49690 (40844, 59835) | 740.84 (608.98, 892.12) | -0.22 (-0.34, -0.11) | -3.24(-3.79,-2.68) | 1342 (1185, 1525) | 43.07 (37.97, 48.93) | 2470 (2033, 2965) | 36.62 (30.14, 43.96) | -0.34 (-0.44, -0.23) | -0.21(-0.23,-0.18) |
| 12 | Central Asia | 1827 (1666, 2010) | 31.80 (28.89, 35.13) | 2405 (2103, 2737) | 24.65 (21.56, 28.02) | -0.76 (-0.89, -0.63) | -0.24(-0.28,-0.20) | 5434 (5007, 5916) | 92.13 (84.66, 100.57) | 7315 (6446, 8240) | 72.04 (63.50, 81.09) | -0.74 (-0.85, -0.63) | -0.61(-0.72,-0.50) | 36424 (33448, 39876) | 616.42 (564.40, 677.16) | 42558 (37255, 48618) | 417.35 (365.54, 475.98) | -1.25 (-1.37, -1.13) | -6.42(-7.07,-5.77) | 1576 (1435, 1741) | 27.93 (25.32, 30.99) | 1862 (1630, 2124) | 19.66 (17.21, 22.38) | -1.10 (-1.22, -0.98) | -0.27(-0.31,-0.24) |
| 13 | Central Europe | 8670 (8070, 9289) | 43.94 (40.82, 47.11) | 18489 (16586, 20441) | 62.25 (55.85, 68.84) | 1.16 (1.09, 1.22) | 0.60(0.56,0.64) | 27600 (25547, 29911) | 136.51 (126.16, 148.18) | 64701 (58226, 71354) | 219.02 (197.09, 241.58) | 1.58 (1.53, 1.64) | 2.70(2.57,2.83) | 155493 (145167, 166422) | 771.17 (719.14, 825.67) | 251114 (227006, 276337) | 853.21 (771.28, 939.17) | 0.31 (0.24, 0.38) | 2.25(1.73,2.77) | 6891 (6424, 7376) | 35.66 (33.15, 38.21) | 11444 (10314, 12582) | 38.25 (34.47, 42.06) | 0.22 (0.14, 0.29) | 0.09(0.06,0.12) |
| 14 | Central Latin America | 2562 (2400, 2713) | 27.82 (25.97, 29.48) | 6015 (5228, 6847) | 19.84 (17.24, 22.57) | -1.41 (-1.52, -1.30) | -0.27(-0.28,-0.26) | 7242 (6804, 7679) | 75.83 (71.12, 80.47) | 18589 (16153, 21227) | 60.38 (52.47, 68.91) | -1.09 (-1.20, -0.97) | -0.52(-0.56,-0.48) | 45958 (43242, 48565) | 484.79 (454.96, 512.58) | 88735 (77362, 101049) | 288.99 (251.97, 328.90) | -1.99 (-2.10, -1.89) | -6.53(-6.83,-6.23) | 2291 (2147, 2423) | 25.52 (23.80, 27.02) | 4525 (3934, 5142) | 15.10 (13.13, 17.14) | -1.98 (-2.08, -1.88) | -0.34(-0.35,-0.32) |
| 15 | Central Sub-Saharan Africa | 527 (372, 730) | 22.07 (15.54, 30.61) | 1218 (866, 1673) | 21.88 (15.41, 30.36) | -0.03 (-0.19, 0.13) | -0.00(-0.01,0.00) | 1290 (912, 1774) | 49.95 (35.60, 68.31) | 3164 (2281, 4262) | 52.54 (37.95, 70.88) | 0.18 (-0.02, 0.38) | 0.09(0.08,0.10) | 11668 (8173, 16175) | 451.90 (316.85, 626.15) | 25256 (17845, 34694) | 422.74 (297.32, 584.75) | -0.20 (-0.33, -0.08) | -0.88(-0.97,-0.79) | 501 (352, 693) | 22.02 (15.42, 30.57) | 1098 (774, 1515) | 20.65 (14.37, 28.91) | -0.20 (-0.33, -0.07) | -0.04(-0.05,-0.04) |
| 16 | East Asia | 36256 (30207, 42369) | 36.00 (30.07, 41.96) | 97604 (77402, 121470) | 35.22 (27.98, 43.70) | -0.11 (-0.33, 0.10) | -0.04(-0.06,-0.02) | 97306 (81234, 113324) | 90.59 (75.74, 105.33) | 368902 (293537, 459024) | 129.53 (103.25, 160.90) | 1.26 (1.03, 1.48) | 1.25(1.21,1.29) | 749024 (620876, 878506) | 704.71 (585.75, 824.58) | 1169054 (928548, 1454234) | 417.45 (332.08, 518.13) | -1.89 (-2.07, -1.71) | -9.79(-10.07,-9.52) | 33449 (27841, 39100) | 34.58 (28.88, 40.32) | 56341 (45017, 69575) | 20.90 (16.73, 25.72) | -1.84 (-2.00, -1.67) | -0.47(-0.48,-0.45) |
| 17 | Eastern Europe | 15466 (14441, 16692) | 40.74 (37.99, 43.98) | 24038 (21367, 26879) | 48.98 (43.55, 54.74) | 0.28 (0.11, 0.44) | 0.34(0.28,0.40) | 45530 (42325, 49354) | 118.00 (109.50, 128.13) | 71713 (63901, 80140) | 145.70 (129.88, 162.80) | 0.40 (0.21, 0.59) | 1.05(0.91,1.19) | 268053 (251149, 287908) | 691.62 (647.57, 742.75) | 319709 (283644, 358805) | 647.66 (574.88, 726.53) | -0.66 (-0.84, -0.47) | -0.75(-1.66,0.16) | 11242 (10527, 12062) | 30.19 (28.22, 32.38) | 13698 (12164, 15324) | 28.14 (24.99, 31.46) | -0.65 (-0.82, -0.48) | -0.03(-0.07,0.00) |
| 18 | Eastern Sub-Saharan Africa | 2823 (2295, 3388) | 33.56 (27.29, 40.23) | 5768 (4580, 7101) | 31.75 (25.31, 38.88) | -0.32 (-0.38, -0.25) | -0.06(-0.07,-0.06) | 6111 (4975, 7309) | 69.12 (56.31, 82.61) | 13318 (10661, 16451) | 69.67 (55.97, 85.64) | -0.10 (-0.19, -0.01) | 0.01(-0.00,0.03) | 62121 (50408, 74882) | 702.33 (570.31, 845.72) | 117739 (92421, 146645) | 617.81 (487.18, 765.81) | -0.55 (-0.60, -0.50) | -2.82(-2.91,-2.73) | 2693 (2187, 3243) | 32.95 (26.78, 39.63) | 5214 (4121, 6451) | 29.55 (23.47, 36.33) | -0.47 (-0.52, -0.43) | -0.11(-0.12,-0.11) |
| 19 | High-income Asia Pacific | 8261 (7385, 9139) | 32.84 (29.27, 36.34) | 28608 (23704, 33024) | 44.91 (37.74, 51.63) | 0.93 (0.69, 1.16) | 0.42(0.37,0.46) | 31924 (28306, 35753) | 124.47 (110.25, 139.46) | 96728 (80500, 112984) | 163.48 (136.90, 190.43) | 0.89 (0.68, 1.11) | 1.34(1.17,1.51) | 75941 (69006, 82396) | 299.18 (271.16, 324.75) | 188636 (163583, 207721) | 304.84 (268.69, 334.52) | -0.16 (-0.38, 0.06) | 0.09(-0.14,0.33) | 3627 (3280, 3924) | 14.84 (13.35, 16.07) | 11276 (9477, 12498) | 16.15 (13.91, 17.79) | 0.05 (-0.16, 0.25) | 0.05(0.04,0.06) |
| 20 | High-income North America | 31350 (29373, 32857) | 67.67 (63.45, 70.90) | 53741 (49210, 57035) | 60.69 (55.65, 64.38) | -0.47 (-0.56, -0.38) | -0.23(-0.26,-0.20) | 150326 (141326, 158266) | 326.24 (307.03, 343.26) | 277462 (257025, 293753) | 314.96 (291.96, 333.34) | -0.24 (-0.30, -0.18) | -0.32(-0.47,-0.17) | 236798 (224118, 246979) | 515.74 (488.47, 537.75) | 319819 (296085, 338793) | 362.27 (335.90, 383.53) | -1.26 (-1.41, -1.11) | -4.89(-5.08,-4.71) | 11026 (10311, 11502) | 23.62 (22.10, 24.64) | 15381 (13967, 16321) | 17.17 (15.63, 18.20) | -1.13 (-1.27, -0.99) | -0.21(-0.22,-0.20) |
| 21 | North Africa and Middle East | 4671 (3822, 5703) | 25.03 (20.39, 30.72) | 12804 (10750, 15052) | 25.56 (21.42, 30.05) | 0.05 (-0.02, 0.12) | 0.02(0.01,0.02) | 15616 (12941, 18877) | 79.63 (65.87, 96.47) | 52064 (44153, 61066) | 99.83 (84.70, 116.97) | 0.70 (0.64, 0.77) | 0.66(0.64,0.68) | 90512 (74076, 110720) | 462.02 (376.86, 566.92) | 180647 (151836, 212280) | 348.88 (292.94, 409.54) | -0.97 (-1.02, -0.91) | -3.68(-3.75,-3.60) | 4130 (3371, 5060) | 23.02 (18.66, 28.39) | 8561 (7189, 10043) | 17.86 (14.96, 20.93) | -0.85 (-0.91, -0.79) | -0.17(-0.17,-0.16) |
| 22 | Oceania | 49 (35, 67) | 16.33 (11.80, 22.17) | 124 (90, 170) | 16.77 (12.20, 22.96) | 0.18 (0.11, 0.25) | 0.01(0.01,0.02) | 119 (86, 161) | 36.55 (26.76, 49.25) | 308 (226, 419) | 38.63 (28.52, 52.39) | 0.21 (0.13, 0.28) | 0.07(0.05,0.08) | 990 (696, 1380) | 306.32 (217.36, 423.19) | 2366 (1676, 3321) | 300.43 (214.35, 419.18) | 0.04 (-0.02, 0.11) | -0.17(-0.24,-0.11) | 44 (31, 61) | 15.42 (11.03, 21.13) | 108 (77, 151) | 15.28 (10.96, 21.18) | 0.08 (0.02, 0.14) | -0.00(-0.01,-0.00) |
| 23 | South Asia | 45514 (38632, 52961) | 70.46 (59.52, 82.13) | 140828 (121116, 160571) | 79.61 (68.43, 90.83) | 0.24 (0.11, 0.37) | 0.35(0.32,0.39) | 95218 (81274, 110350) | 140.72 (119.68, 163.37) | 318099 (275157, 362096) | 173.45 (150.05, 197.47) | 0.50 (0.32, 0.67) | 1.17(1.09,1.25) | 963024 (816409, 1124945) | 1419.42 (1199.10, 1660.20) | 2523167 (2170760, 2883034) | 1383.75 (1190.49, 1581.57) | -0.23 (-0.33, -0.13) | -0.09(-0.78,0.61) | 41698 (35211, 48792) | 66.55 (55.90, 78.03) | 114753 (98805, 131086) | 66.60 (57.31, 76.13) | -0.14 (-0.24, -0.04) | 0.06(0.03,0.10) |
| 24 | Southeast Asia | 10499 (8876, 12326) | 37.51 (31.67, 44.07) | 31165 (25926, 37188) | 41.08 (34.10, 49.07) | 0.14 (0.09, 0.18) | 0.11(0.10,0.12) | 25886 (21977, 30217) | 87.54 (74.29, 102.22) | 92083 (76642, 109865) | 115.16 (95.76, 137.53) | 0.74 (0.67, 0.81) | 0.89(0.87,0.91) | 201707 (170527, 237347) | 686.55 (580.34, 807.89) | 496460 (415522, 588401) | 626.44 (524.17, 742.56) | -0.45 (-0.49, -0.40) | -2.01(-2.12,-1.90) | 9226 (7798, 10850) | 34.05 (28.72, 40.09) | 23233 (19408, 27542) | 31.78 (26.48, 37.71) | -0.37 (-0.41, -0.32) | -0.08(-0.08,-0.07) |
| 25 | Southern Latin America | 2334 (1992, 2713) | 39.42 (33.62, 45.82) | 3211 (2688, 3789) | 28.50 (23.86, 33.64) | -0.87 (-0.98, -0.76) | -0.35(-0.38,-0.31) | 7765 (6673, 9021) | 129.26 (111.04, 150.21) | 12260 (10462, 14298) | 109.49 (93.40, 127.75) | -0.48 (-0.64, -0.31) | -0.61(-0.72,-0.50) | 39596 (33989, 45903) | 661.17 (567.32, 766.47) | 41913 (35374, 49205) | 374.29 (315.97, 439.42) | -1.65 (-1.75, -1.55) | -8.76(-9.18,-8.34) | 1806 (1549, 2091) | 30.99 (26.56, 35.89) | 2063 (1728, 2421) | 18.18 (15.23, 21.34) | -1.47 (-1.57, -1.37) | -0.41(-0.44,-0.38) |
| 26 | Southern Sub-Saharan Africa | 962 (729, 1232) | 30.66 (23.27, 39.23) | 2229 (1940, 2533) | 32.66 (28.38, 37.12) | 0.09 (-0.10, 0.27) | 0.07(0.05,0.08) | 2526 (1945, 3265) | 77.79 (60.01, 100.37) | 5913 (5178, 6717) | 82.82 (72.50, 94.05) | 0.08 (-0.03, 0.18) | 0.18(0.13,0.23) | 18362 (13991, 23559) | 565.94 (431.93, 725.26) | 40852 (35654, 46420) | 575.47 (502.01, 653.82) | -0.05 (-0.31, 0.21) | 0.29(-0.05,0.63) | 836 (639, 1069) | 27.34 (20.95, 34.91) | 1808 (1578, 2051) | 27.33 (23.81, 31.02) | -0.12 (-0.37, 0.13) | 0.02(-0.01,0.05) |
| 27 | Tropical Latin America | 4310 (3958, 4665) | 40.64 (37.13, 44.03) | 13192 (11825, 14486) | 40.90 (36.60, 44.92) | 0.03 (-0.03, 0.09) | 0.01(-0.02,0.05) | 10981 (10132, 11860) | 99.37 (91.46, 107.44) | 38888 (35144, 42629) | 119.21 (107.63, 130.70) | 0.57 (0.50, 0.65) | 0.70(0.63,0.77) | 81373 (75001, 87857) | 740.96 (680.62, 800.55) | 210474 (190516, 229602) | 645.58 (583.67, 704.45) | -0.44 (-0.51, -0.37) | -2.34(-2.82,-1.87) | 3706 (3402, 4004) | 35.97 (32.80, 38.91) | 9822 (8797, 10746) | 30.74 (27.48, 33.65) | -0.45 (-0.51, -0.38) | -0.16(-0.19,-0.13) |
| 28 | Western Europe | 43077 (39627, 46599) | 57.01 (52.42, 61.71) | 68306 (60349, 75431) | 58.02 (51.67, 63.99) | 0.13 (0.02, 0.25) | 0.03(-0.00,0.06) | 176876 (162934, 192498) | 235.57 (217.08, 256.34) | 311659 (279092, 342954) | 272.92 (245.52, 300.06) | 0.58 (0.50, 0.65) | 1.20(1.10,1.31) | 487778 (452932, 522055) | 651.24 (604.57, 697.26) | 528996 (472051, 580407) | 459.37 (412.76, 503.43) | -1.13 (-1.29, -0.98) | -6.65(-6.89,-6.40) | 22905 (21195, 24482) | 30.07 (27.80, 32.16) | 26965 (23653, 29629) | 21.61 (19.17, 23.69) | -1.06 (-1.22, -0.90) | -0.29(-0.30,-0.28) |
| 29 | Western Sub-Saharan Africa | 1345 (1075, 1644) | 13.49 (10.81, 16.43) | 3086 (2470, 3756) | 14.96 (12.07, 18.10) | 0.41 (0.36, 0.46) | 0.05(0.04,0.05) | 3672 (2941, 4482) | 35.12 (28.24, 42.76) | 8802 (7036, 10669) | 40.26 (32.41, 48.55) | 0.54 (0.48, 0.60) | 0.17(0.16,0.18) | 28924 (23006, 35491) | 277.81 (221.70, 339.98) | 61423 (49028, 75239) | 283.18 (227.54, 345.02) | 0.13 (0.07, 0.19) | 0.17(0.11,0.24) | 1301 (1041, 1589) | 13.41 (10.78, 16.34) | 2816 (2269, 3426) | 14.17 (11.51, 17.12) | 0.27 (0.21, 0.34) | 0.03(0.02,0.03) |
| Nasopharynx cancer |  |  |  |  |  |  |  |  |  |  |  |  |  |  |  |  |  |  |  |  |  |  |  |  |  |
| 1 | Global | 25583 (22802, 28397) | 5.18 (4.61, 5.74) | 41604 (36264, 47602) | 3.79 (3.31, 4.34) | -1.31 (-1.51, -1.11) | -0.05(-0.05,-0.04) | 61889 (55326, 68584) | 12.21 (10.92, 13.53) | 128263 (109943, 149593) | 11.59 (9.93, 13.51) | -0.38 (-0.61, -0.15) | -0.02(-0.03,-0.02) | 606448 (538898, 673957) | 120.10 (106.73, 133.41) | 813634 (720467, 918359) | 73.76 (65.30, 83.25) | -1.91 (-2.09, -1.73) | -1.53(-1.57,-1.50) | 26519 (23587, 29446) | 5.44 (4.83, 6.03) | 37342 (32981, 42125) | 3.43 (3.03, 3.87) | -1.84 (-2.02, -1.66) | -0.07(-0.07,-0.06) |
| 2 | Male | 17085 (14626, 19769) | 7.66 (6.56, 8.85) | 30149 (25573, 35711) | 5.92 (5.03, 7.00) | -1.14 (-1.34, -0.95) |  | 41559 (35605, 48025) | 17.84 (15.30, 20.58) | 95141 (78416, 115176) | 18.23 (15.04, 22.03) | -0.12 (-0.35, 0.11) |  | 408113 (347185, 473436) | 176.39 (150.23, 204.24) | 583951 (504385, 683255) | 112.91 (97.56, 131.97) | -1.78 (-1.95, -1.60) |  | 17546 (14960, 20303) | 8.04 (6.86, 9.28) | 26344 (22792, 30707) | 5.27 (4.56, 6.13) | -1.73 (-1.91, -1.55) |  |
| 3 | Female | 8498 (7306, 9801) | 3.16 (2.71, 3.64) | 11455 (9752, 13321) | 1.95 (1.66, 2.27) | -1.89 (-2.10, -1.67) |  | 20331 (17546, 23392) | 7.45 (6.43, 8.57) | 33122 (27916, 39353) | 5.66 (4.77, 6.73) | -1.16 (-1.40, -0.92) |  | 198335 (171089, 228784) | 72.93 (62.88, 84.12) | 229683 (199769, 263063) | 39.22 (34.13, 44.92) | -2.37 (-2.57, -2.15) |  | 8973 (7729, 10352) | 3.36 (2.89, 3.88) | 10997 (9447, 12644) | 1.87 (1.61, 2.15) | -2.25 (-2.46, -2.05) |  |
| 4 | High SDI | 3344 (3139, 3539) | 2.33 (2.19, 2.47) | 5034 (4484, 5544) | 1.86 (1.66, 2.05) | -0.96 (-1.04, -0.87) | -0.02(-0.02,-0.01) | 9938 (9408, 10488) | 6.94 (6.57, 7.33) | 17105 (15362, 18816) | 6.54 (5.88, 7.19) | -0.36 (-0.44, -0.27) | -0.01(-0.02,-0.01) | 67479 (63489, 71578) | 47.27 (44.47, 50.16) | 85589 (76707, 94510) | 32.06 (28.82, 35.41) | -1.53 (-1.62, -1.44) | -0.50(-0.51,-0.49) | 3057 (2861, 3246) | 2.13 (1.99, 2.26) | 4243 (3748, 4685) | 1.52 (1.35, 1.68) | -1.35 (-1.45, -1.26) | -0.02(-0.02,-0.02) |
| 5 | High-middle SDI | 8226 (6797, 9876) | 6.49 (5.36, 7.78) | 13068 (10333, 16471) | 5.06 (4.00, 6.37) | -1.14 (-1.37, -0.91) | -0.05(-0.05,-0.05) | 19691 (16223, 23670) | 15.03 (12.39, 18.06) | 46386 (35949, 59674) | 17.85 (13.84, 22.93) | 0.43 (0.13, 0.73) | 0.08(0.06,0.09) | 193957 (160579, 233053) | 149.11 (123.44, 179.08) | 226122 (183058, 282131) | 87.30 (70.70, 108.84) | -2.11 (-2.30, -1.93) | -2.09(-2.18,-2.00) | 8575 (7104, 10277) | 6.87 (5.69, 8.23) | 10417 (8468, 12900) | 4.06 (3.30, 5.02) | -2.14 (-2.34, -1.94) | -0.09(-0.10,-0.09) |
| 6 | Middle SDI | 10091 (8699, 11497) | 8.29 (7.16, 9.43) | 15995 (13573, 18813) | 4.81 (4.08, 5.65) | -2.12 (-2.39, -1.86) | -0.12(-0.12,-0.11) | 23584 (20249, 26918) | 18.53 (15.93, 21.12) | 47654 (39712, 57157) | 13.93 (11.61, 16.68) | -1.20 (-1.52, -0.89) | -0.15(-0.15,-0.14) | 245111 (210828, 279187) | 193.42 (166.65, 220.03) | 317879 (273891, 369299) | 93.87 (80.82, 108.98) | -2.72 (-2.96, -2.48) | -3.25(-3.30,-3.20) | 10669 (9204, 12141) | 8.97 (7.76, 10.19) | 14584 (12535, 16928) | 4.47 (3.83, 5.18) | -2.66 (-2.89, -2.42) | -0.15(-0.15,-0.14) |
| 7 | Low-middle SDI | 2837 (2379, 3361) | 3.95 (3.31, 4.69) | 5636 (4969, 6465) | 3.26 (2.87, 3.73) | -0.74 (-0.85, -0.63) | -0.02(-0.02,-0.02) | 6307 (5298, 7459) | 8.45 (7.10, 10.01) | 12876 (11355, 14776) | 7.22 (6.37, 8.29) | -0.62 (-0.73, -0.50) | -0.04(-0.04,-0.03) | 72095 (60468, 85360) | 96.61 (80.97, 114.55) | 137601 (121248, 157707) | 77.22 (68.02, 88.50) | -0.84 (-0.95, -0.72) | -0.57(-0.62,-0.53) | 3053 (2557, 3619) | 4.33 (3.62, 5.15) | 6079 (5359, 6971) | 3.57 (3.14, 4.09) | -0.74 (-0.84, -0.63) | -0.02(-0.02,-0.02) |
| 8 | Low SDI | 1074 (863, 1309) | 4.01 (3.22, 4.90) | 1850 (1498, 2285) | 3.22 (2.61, 3.98) | -0.84 (-0.99, -0.70) | -0.02(-0.03,-0.02) | 2343 (1886, 2855) | 8.41 (6.76, 10.25) | 4189 (3386, 5180) | 7.02 (5.68, 8.66) | -0.71 (-0.85, -0.57) | -0.04(-0.04,-0.04) | 27529 (22138, 33557) | 98.80 (79.39, 120.55) | 45944 (37007, 57021) | 77.04 (62.14, 95.44) | -0.97 (-1.11, -0.82) | -0.68(-0.71,-0.65) | 1153 (926, 1406) | 4.40 (3.53, 5.37) | 1997 (1613, 2471) | 3.55 (2.87, 4.39) | -0.82 (-0.96, -0.67) | -0.03(-0.03,-0.02) |
| 9 | Andean Latin America | 16 (13, 19) | 0.68 (0.55, 0.83) | 42 (31, 55) | 0.59 (0.44, 0.77) | -0.39 (-0.49, -0.30) | -0.00(-0.00,-0.00) | 33 (27, 40) | 1.40 (1.13, 1.71) | 91 (68, 120) | 1.27 (0.95, 1.67) | -0.27 (-0.36, -0.17) | -0.00(-0.00,-0.00) | 354 (287, 434) | 15.01 (12.17, 18.39) | 893 (669, 1170) | 12.45 (9.33, 16.31) | -0.57 (-0.66, -0.47) | -0.08(-0.09,-0.07) | 18 (14, 22) | 0.78 (0.63, 0.96) | 47 (35, 62) | 0.67 (0.50, 0.87) | -0.43 (-0.53, -0.32) | -0.00(-0.00,-0.00) |
| 10 | Australasia | 106 (86, 128) | 3.40 (2.76, 4.12) | 134 (99, 175) | 1.92 (1.42, 2.51) | -2.10 (-2.26, -1.94) | -0.05(-0.05,-0.05) | 436 (352, 530) | 13.93 (11.23, 16.92) | 633 (469, 832) | 9.26 (6.84, 12.18) | -1.58 (-1.80, -1.36) | -0.15(-0.16,-0.14) | 1528 (1264, 1812) | 49.15 (40.59, 58.35) | 1508 (1116, 1958) | 21.88 (16.18, 28.45) | -2.83 (-2.93, -2.74) | -0.88(-0.91,-0.85) | 69 (57, 81) | 2.21 (1.84, 2.63) | 74 (55, 96) | 1.03 (0.77, 1.34) | -2.68 (-2.77, -2.59) | -0.04(-0.04,-0.04) |
| 11 | Caribbean | 60 (51, 69) | 1.93 (1.65, 2.24) | 144 (118, 175) | 2.15 (1.76, 2.61) | 0.46 (0.35, 0.56) | 0.01(0.01,0.01) | 129 (111, 149) | 4.05 (3.48, 4.66) | 328 (271, 399) | 4.91 (4.04, 5.96) | 0.74 (0.62, 0.86) | 0.03(0.03,0.03) | 1346 (1156, 1557) | 42.39 (36.39, 49.08) | 3160 (2598, 3837) | 47.14 (38.77, 57.22) | 0.44 (0.34, 0.55) | 0.16(0.13,0.20) | 67 (57, 77) | 2.19 (1.88, 2.54) | 158 (129, 192) | 2.34 (1.92, 2.84) | 0.33 (0.23, 0.43) | 0.01(0.00,0.01) |
| 12 | Central Asia | 71 (61, 89) | 1.27 (1.07, 1.60) | 139 (117, 164) | 1.42 (1.20, 1.68) | 0.40 (0.21, 0.59) | 0.00(0.00,0.01) | 158 (135, 192) | 2.71 (2.31, 3.34) | 310 (262, 367) | 3.02 (2.55, 3.57) | 0.41 (0.21, 0.61) | 0.01(0.01,0.01) | 1757 (1509, 2136) | 30.17 (25.80, 37.15) | 3428 (2879, 4079) | 33.32 (28.02, 39.57) | 0.34 (0.17, 0.52) | 0.10(0.06,0.14) | 78 (66, 98) | 1.42 (1.19, 1.81) | 150 (126, 178) | 1.58 (1.33, 1.87) | 0.38 (0.19, 0.57) | 0.01(0.00,0.01) |
| 13 | Central Europe | 245 (225, 266) | 1.26 (1.15, 1.37) | 410 (360, 464) | 1.37 (1.20, 1.55) | 0.30 (-0.01, 0.61) | 0.00(0.00,0.00) | 547 (504, 592) | 2.71 (2.50, 2.94) | 976 (860, 1103) | 3.31 (2.91, 3.74) | 0.70 (0.38, 1.03) | 0.02(0.02,0.02) | 5920 (5459, 6407) | 29.53 (27.17, 32.01) | 9302 (8187, 10541) | 31.53 (27.73, 35.74) | 0.22 (-0.09, 0.54) | 0.06(0.04,0.08) | 266 (245, 289) | 1.39 (1.27, 1.51) | 435 (382, 493) | 1.45 (1.27, 1.64) | 0.15 (-0.16, 0.45) | 0.00(0.00,0.00) |
| 14 | Central Latin America | 93 (86, 100) | 1.00 (0.92, 1.08) | 237 (204, 274) | 0.78 (0.67, 0.90) | -1.13 (-1.27, -0.98) | -0.01(-0.01,-0.01) | 204 (189, 220) | 2.12 (1.95, 2.29) | 543 (467, 628) | 1.75 (1.51, 2.03) | -0.95 (-1.11, -0.80) | -0.01(-0.01,-0.01) | 2151 (1989, 2319) | 22.37 (20.65, 24.13) | 5288 (4551, 6119) | 17.07 (14.69, 19.75) | -1.23 (-1.38, -1.08) | -0.17(-0.18,-0.16) | 103 (95, 111) | 1.13 (1.04, 1.22) | 260 (223, 301) | 0.86 (0.74, 0.99) | -1.19 (-1.33, -1.04) | -0.01(-0.01,-0.01) |
| 15 | Central Sub-Saharan Africa | 40 (28, 58) | 1.59 (1.10, 2.31) | 84 (59, 125) | 1.46 (1.00, 2.20) | -0.32 (-0.39, -0.25) | -0.00(-0.00,-0.00) | 87 (61, 125) | 3.22 (2.25, 4.63) | 190 (132, 281) | 3.07 (2.13, 4.58) | -0.16 (-0.23, -0.08) | -0.00(-0.01,-0.00) | 1032 (726, 1471) | 38.19 (26.65, 54.81) | 2140 (1485, 3211) | 34.58 (23.83, 52.29) | -0.35 (-0.41, -0.28) | -0.11(-0.12,-0.11) | 43 (30, 62) | 1.77 (1.22, 2.57) | 91 (63, 137) | 1.62 (1.10, 2.48) | -0.32 (-0.38, -0.25) | -0.00(-0.01,-0.00) |
| 16 | East Asia | 15308 (12780, 17832) | 14.89 (12.46, 17.32) | 22391 (17771, 27878) | 7.98 (6.34, 9.91) | -2.48 (-2.77, -2.19) | -0.23(-0.24,-0.22) | 36569 (30475, 42706) | 33.31 (27.82, 38.83) | 79296 (62355, 99547) | 27.68 (21.79, 34.72) | -0.92 (-1.26, -0.57) | -0.20(-0.22,-0.17) | 364929 (303879, 425923) | 336.87 (281.27, 392.54) | 381338 (305654, 472471) | 134.85 (108.18, 167.00) | -3.46 (-3.70, -3.21) | -6.73(-6.90,-6.56) | 15963 (13366, 18586) | 16.07 (13.49, 18.68) | 17667 (14235, 21699) | 6.43 (5.19, 7.89) | -3.49 (-3.74, -3.23) | -0.32(-0.33,-0.31) |
| 17 | Eastern Europe | 366 (332, 415) | 0.98 (0.89, 1.11) | 483 (423, 555) | 0.99 (0.87, 1.13) | -0.33 (-0.54, -0.13) | 0.00(-0.00,0.00) | 828 (751, 941) | 2.15 (1.95, 2.45) | 1116 (978, 1282) | 2.27 (1.99, 2.60) | -0.13 (-0.29, 0.04) | 0.01(0.00,0.01) | 9247 (8395, 10531) | 24.07 (21.86, 27.41) | 11925 (10422, 13757) | 24.15 (21.12, 27.83) | -0.37 (-0.59, -0.15) | 0.03(-0.01,0.08) | 394 (359, 448) | 1.07 (0.97, 1.21) | 518 (455, 596) | 1.06 (0.93, 1.22) | -0.37 (-0.58, -0.17) | 0.00(-0.00,0.00) |
| 18 | Eastern Sub-Saharan Africa | 496 (391, 607) | 5.64 (4.44, 6.91) | 916 (689, 1192) | 4.85 (3.66, 6.30) | -0.64 (-0.70, -0.58) | -0.02(-0.03,-0.02) | 1067 (843, 1306) | 11.68 (9.23, 14.31) | 2087 (1564, 2726) | 10.63 (7.99, 13.85) | -0.42 (-0.47, -0.37) | -0.04(-0.04,-0.03) | 12698 (10003, 15548) | 138.90 (109.38, 170.22) | 23091 (17241, 30219) | 117.53 (88.05, 153.45) | -0.71 (-0.77, -0.65) | -0.69(-0.71,-0.67) | 533 (419, 653) | 6.17 (4.85, 7.57) | 985 (739, 1284) | 5.33 (4.01, 6.92) | -0.63 (-0.69, -0.57) | -0.03(-0.03,-0.03) |
| 19 | High-income Asia Pacific | 363 (333, 396) | 1.44 (1.31, 1.57) | 997 (864, 1107) | 1.60 (1.40, 1.78) | 0.05 (-0.28, 0.39) | 0.01(0.00,0.01) | 885 (815, 961) | 3.42 (3.15, 3.72) | 2348 (2051, 2616) | 4.14 (3.63, 4.61) | 0.44 (0.06, 0.82) | 0.02(0.02,0.03) | 8219 (7554, 8990) | 31.98 (29.32, 35.00) | 18926 (16674, 20870) | 32.12 (28.57, 35.43) | -0.35 (-0.67, -0.03) | 0.01(-0.02,0.03) | 382 (349, 417) | 1.53 (1.39, 1.68) | 1094 (946, 1208) | 1.66 (1.46, 1.83) | -0.10 (-0.42, 0.22) | 0.00(0.00,0.01) |
| 20 | High-income North America | 885 (830, 932) | 1.93 (1.81, 2.03) | 1202 (1098, 1288) | 1.37 (1.25, 1.46) | -1.30 (-1.38, -1.23) | -0.02(-0.02,-0.02) | 3260 (3068, 3432) | 7.18 (6.76, 7.55) | 5081 (4671, 5440) | 5.82 (5.36, 6.23) | -0.86 (-0.93, -0.78) | -0.04(-0.05,-0.04) | 14481 (13679, 15181) | 31.82 (30.07, 33.34) | 16754 (15479, 17861) | 19.10 (17.66, 20.35) | -1.83 (-1.95, -1.72) | -0.41(-0.42,-0.40) | 659 (616, 693) | 1.42 (1.33, 1.50) | 777 (705, 832) | 0.87 (0.80, 0.94) | -1.75 (-1.85, -1.65) | -0.02(-0.02,-0.02) |
| 21 | North Africa and Middle East | 568 (466, 689) | 2.99 (2.44, 3.65) | 1145 (941, 1371) | 2.25 (1.84, 2.69) | -1.05 (-1.13, -0.98) | -0.02(-0.02,-0.02) | 1283 (1055, 1554) | 6.40 (5.25, 7.77) | 2787 (2293, 3343) | 5.20 (4.28, 6.24) | -0.78 (-0.85, -0.72) | -0.04(-0.04,-0.04) | 13809 (11331, 16766) | 68.99 (56.46, 84.02) | 26370 (21658, 31596) | 49.47 (40.62, 59.26) | -1.21 (-1.28, -1.14) | -0.63(-0.64,-0.62) | 617 (505, 751) | 3.34 (2.71, 4.08) | 1207 (992, 1444) | 2.43 (2.00, 2.91) | -1.15 (-1.23, -1.07) | -0.03(-0.03,-0.03) |
| 22 | Oceania | 12 (8, 18) | 3.57 (2.44, 5.22) | 24 (16, 37) | 2.91 (1.93, 4.51) | -0.61 (-0.70, -0.53) | -0.02(-0.02,-0.02) | 28 (19, 41) | 7.68 (5.23, 11.27) | 55 (36, 87) | 6.44 (4.26, 10.00) | -0.53 (-0.62, -0.43) | -0.04(-0.04,-0.04) | 312 (209, 463) | 86.90 (58.83, 127.86) | 605 (396, 942) | 70.20 (46.31, 108.59) | -0.65 (-0.74, -0.55) | -0.53(-0.55,-0.51) | 13 (9, 19) | 3.90 (2.67, 5.68) | 25 (17, 39) | 3.19 (2.12, 4.89) | -0.61 (-0.69, -0.53) | -0.02(-0.02,-0.02) |
| 23 | South Asia | 3028 (2492, 3575) | 4.49 (3.69, 5.32) | 6096 (5284, 6983) | 3.38 (2.92, 3.87) | -1.14 (-1.34, -0.93) | -0.03(-0.04,-0.03) | 6776 (5597, 7984) | 9.65 (7.95, 11.39) | 14017 (12172, 16070) | 7.54 (6.55, 8.65) | -1.02 (-1.23, -0.81) | -0.06(-0.07,-0.06) | 77790 (64210, 91812) | 110.86 (91.30, 131.11) | 148883 (129102, 170156) | 80.18 (69.52, 91.67) | -1.27 (-1.47, -1.06) | -0.92(-0.99,-0.86) | 3243 (2669, 3838) | 4.91 (4.03, 5.83) | 6553 (5682, 7504) | 3.68 (3.19, 4.22) | -1.13 (-1.33, -0.93) | -0.04(-0.04,-0.03) |
| 24 | Southeast Asia | 2082 (1755, 2450) | 7.15 (6.02, 8.42) | 4892 (4173, 5669) | 6.20 (5.28, 7.18) | -0.61 (-0.67, -0.56) | -0.03(-0.03,-0.03) | 4696 (3966, 5528) | 15.45 (13.05, 18.19) | 11611 (9908, 13465) | 14.07 (12.01, 16.31) | -0.46 (-0.51, -0.41) | -0.05(-0.05,-0.04) | 51442 (43447, 60630) | 169.14 (142.87, 199.39) | 116769 (99635, 135391) | 141.97 (121.21, 164.54) | -0.72 (-0.77, -0.67) | -0.89(-0.92,-0.86) | 2251 (1900, 2653) | 7.90 (6.66, 9.32) | 5198 (4436, 6028) | 6.75 (5.75, 7.82) | -0.66 (-0.72, -0.61) | -0.04(-0.04,-0.04) |
| 25 | Southern Latin America | 79 (66, 94) | 1.36 (1.13, 1.63) | 79 (60, 102) | 0.70 (0.54, 0.90) | -1.81 (-1.96, -1.66) | -0.02(-0.02,-0.02) | 177 (147, 211) | 2.97 (2.47, 3.54) | 185 (142, 238) | 1.65 (1.27, 2.13) | -1.58 (-1.72, -1.44) | -0.04(-0.04,-0.04) | 1823 (1521, 2178) | 30.78 (25.65, 36.80) | 1676 (1288, 2159) | 14.97 (11.50, 19.28) | -2.00 (-2.15, -1.86) | -0.50(-0.51,-0.48) | 86 (72, 103) | 1.51 (1.26, 1.81) | 85 (65, 110) | 0.75 (0.57, 0.97) | -1.89 (-2.05, -1.73) | -0.02(-0.02,-0.02) |
| 26 | Southern Sub-Saharan Africa | 69 (55, 85) | 2.18 (1.75, 2.68) | 153 (136, 172) | 2.23 (1.97, 2.50) | -0.03 (-0.32, 0.25) | 0.00(0.00,0.00) | 153 (123, 189) | 4.70 (3.76, 5.80) | 341 (303, 383) | 4.76 (4.23, 5.36) | -0.05 (-0.27, 0.18) | 0.00(-0.00,0.00) | 1668 (1334, 2054) | 51.02 (40.85, 62.90) | 3733 (3315, 4202) | 52.23 (46.35, 58.78) | -0.02 (-0.32, 0.28) | 0.03(-0.02,0.07) | 75 (60, 93) | 2.42 (1.95, 2.99) | 165 (146, 185) | 2.45 (2.17, 2.76) | -0.07 (-0.36, 0.21) | 0.00(0.00,0.00) |
| 27 | Tropical Latin America | 56 (50, 62) | 0.52 (0.47, 0.58) | 204 (180, 227) | 0.63 (0.56, 0.70) | 0.35 (-0.08, 0.78) | 0.00(0.00,0.01) | 126 (114, 139) | 1.13 (1.02, 1.25) | 487 (433, 541) | 1.49 (1.32, 1.66) | 0.58 (0.14, 1.02) | 0.01(0.01,0.02) | 1354 (1228, 1499) | 12.18 (11.01, 13.50) | 4783 (4255, 5334) | 14.61 (12.98, 16.30) | 0.28 (-0.16, 0.72) | 0.10(0.09,0.12) | 60 (55, 67) | 0.57 (0.52, 0.64) | 219 (193, 245) | 0.68 (0.60, 0.76) | 0.28 (-0.15, 0.71) | 0.00(0.00,0.01) |
| 28 | Western Europe | 1456 (1341, 1572) | 1.94 (1.78, 2.09) | 1508 (1306, 1731) | 1.29 (1.13, 1.49) | -1.31 (-1.39, -1.23) | -0.02(-0.02,-0.02) | 4048 (3731, 4376) | 5.43 (5.00, 5.87) | 5052 (4395, 5829) | 4.58 (4.00, 5.29) | -0.51 (-0.61, -0.41) | -0.03(-0.03,-0.02) | 30104 (27913, 32414) | 40.47 (37.53, 43.59) | 25186 (22064, 28667) | 22.22 (19.56, 25.27) | -1.98 (-2.08, -1.88) | -0.60(-0.62,-0.59) | 1397 (1287, 1506) | 1.85 (1.70, 1.99) | 1280 (1107, 1459) | 1.05 (0.91, 1.19) | -1.88 (-1.97, -1.78) | -0.03(-0.03,-0.03) |
| 29 | Western Sub-Saharan Africa | 184 (145, 226) | 1.83 (1.45, 2.24) | 324 (241, 424) | 1.55 (1.17, 2.00) | -0.64 (-0.76, -0.52) | -0.01(-0.01,-0.01) | 398 (313, 489) | 3.79 (2.99, 4.65) | 727 (534, 956) | 3.30 (2.46, 4.30) | -0.53 (-0.68, -0.39) | -0.02(-0.02,-0.02) | 4484 (3530, 5511) | 42.75 (33.74, 52.48) | 7878 (5823, 10374) | 35.75 (26.73, 46.64) | -0.68 (-0.81, -0.55) | -0.24(-0.25,-0.22) | 202 (160, 248) | 2.05 (1.62, 2.51) | 354 (266, 460) | 1.73 (1.32, 2.22) | -0.64 (-0.75, -0.52) | -0.01(-0.01,-0.01) |
| Lip and oral cavity cancer |  |  |  |  |  |  |  |  |  |  |  |  |  |  |  |  |  |  |  |  |  |  |  |  |  |
| 1 | Global | 93321 (87924, 98103) | 19.66 (18.42, 20.69) | 249668 (226147, 268150) | 23.13 (20.90, 24.86) | 0.51 (0.44, 0.58) | 0.12(0.11,0.12) | 267894 (254726, 279302) | 54.41 (51.55, 56.78) | 789771 (723809, 842393) | 72.19 (66.03, 77.03) | 0.99 (0.91, 1.06) | 0.58(0.56,0.60) | 1233771 (1159104, 1308912) | 251.49 (235.59, 266.94) | 2762876 (2494305, 2979788) | 253.10 (228.19, 273.06) | -0.07 (-0.12, -0.01) | 0.10(0.02,0.17) | 57030 (53315, 60529) | 12.31 (11.44, 13.09) | 134430 (120512, 145262) | 12.57 (11.24, 13.59) | 0.00 (-0.05, 0.05) | 0.01(0.01,0.01) |
| 2 | Male | 60946 (57202, 64866) | 28.86 (26.97, 30.73) | 158206 (141812, 172069) | 32.01 (28.64, 34.82) | 0.34 (0.25, 0.43) |  | 172021 (162760, 181183) | 76.95 (72.60, 81.07) | 489736 (444621, 529309) | 96.06 (87.08, 103.84) | 0.82 (0.72, 0.91) |  | 840847 (781750, 908054) | 378.12 (350.81, 408.28) | 1816317 (1601370, 1995698) | 357.69 (315.36, 392.87) | -0.25 (-0.31, -0.20) |  | 37591 (34843, 40570) | 18.46 (17.04, 19.92) | 85153 (75150, 93407) | 17.57 (15.50, 19.27) | -0.21 (-0.27, -0.16) |  |
| 3 | Female | 32375 (29604, 34593) | 12.39 (11.27, 13.26) | 91462 (80150, 99920) | 15.57 (13.65, 17.01) | 0.69 (0.63, 0.75) |  | 95874 (88946, 101261) | 35.71 (33.03, 37.75) | 300035 (267501, 323926) | 51.19 (45.64, 55.26) | 1.19 (1.14, 1.24) |  | 392924 (356076, 425154) | 147.76 (133.56, 160.00) | 946559 (840635, 1043657) | 161.51 (143.49, 178.07) | 0.18 (0.12, 0.24) |  | 19440 (17495, 21038) | 7.60 (6.80, 8.23) | 49276 (42905, 54477) | 8.37 (7.30, 9.26) | 0.24 (0.18, 0.29) |  |
| 4 | High SDI | 35498 (33204, 37301) | 24.59 (22.98, 25.86) | 75128 (67212, 80619) | 26.71 (24.12, 28.56) | 0.35 (0.27, 0.43) | 0.07(0.06,0.09) | 142016 (133568, 149120) | 98.15 (92.33, 103.08) | 321721 (293041, 342186) | 118.35 (108.40, 125.60) | 0.75 (0.69, 0.81) | 0.65(0.60,0.70) | 292650 (276303, 306439) | 204.01 (192.39, 213.74) | 474942 (432286, 505560) | 172.45 (158.32, 182.98) | -0.52 (-0.62, -0.42) | -1.00(-1.08,-0.93) | 14189 (13248, 14840) | 9.90 (9.22, 10.37) | 25312 (22296, 27176) | 8.65 (7.73, 9.25) | -0.41 (-0.50, -0.31) | -0.04(-0.04,-0.04) |
| 5 | High-middle SDI | 19452 (18231, 20608) | 15.76 (14.70, 16.72) | 46404 (41169, 51304) | 18.17 (16.10, 20.09) | 0.43 (0.36, 0.50) | 0.09(0.08,0.09) | 54381 (50471, 58561) | 42.31 (39.15, 45.60) | 158616 (140241, 176392) | 61.53 (54.36, 68.42) | 1.29 (1.22, 1.36) | 0.62(0.59,0.65) | 251133 (237420, 264140) | 197.42 (185.87, 207.92) | 442462 (397185, 485793) | 172.38 (154.59, 189.26) | -0.58 (-0.66, -0.51) | -0.74(-0.85,-0.64) | 11546 (10865, 12164) | 9.70 (9.06, 10.24) | 21528 (19153, 23664) | 8.52 (7.57, 9.37) | -0.52 (-0.59, -0.46) | -0.04(-0.04,-0.03) |
| 6 | Middle SDI | 16644 (15301, 17992) | 14.67 (13.44, 15.89) | 64002 (56389, 71533) | 19.78 (17.39, 22.11) | 0.90 (0.81, 0.99) | 0.17(0.16,0.17) | 34234 (31505, 36900) | 27.73 (25.47, 29.91) | 177130 (156010, 198404) | 52.55 (46.24, 58.85) | 2.04 (1.92, 2.16) | 0.81(0.80,0.83) | 278422 (256132, 301406) | 232.51 (213.32, 251.90) | 798376 (708746, 887245) | 241.29 (213.84, 268.17) | -0.01 (-0.07, 0.04) | 0.34(0.26,0.42) | 12848 (11789, 13902) | 11.90 (10.87, 12.91) | 38572 (34124, 42918) | 12.29 (10.83, 13.68) | 0.00 (-0.05, 0.05) | 0.01(0.01,0.02) |
| 7 | Low-middle SDI | 17042 (14718, 19467) | 25.08 (21.57, 28.70) | 51772 (44821, 58596) | 31.01 (26.82, 35.10) | 0.59 (0.51, 0.68) | 0.21(0.20,0.22) | 29379 (25453, 33383) | 40.39 (34.91, 45.93) | 108108 (94305, 121911) | 61.50 (53.62, 69.33) | 1.29 (1.16, 1.42) | 0.72(0.70,0.74) | 321450 (278192, 368255) | 450.96 (389.24, 517.08) | 836118 (723028, 947292) | 484.52 (418.80, 548.92) | 0.15 (0.09, 0.21) | 1.32(1.09,1.54) | 14443 (12454, 16548) | 22.03 (18.91, 25.30) | 39235 (33977, 44405) | 24.26 (20.97, 27.47) | 0.22 (0.15, 0.29) | 0.08(0.07,0.10) |
| 8 | Low SDI | 4583 (3847, 5306) | 18.48 (15.52, 21.44) | 12145 (10159, 14305) | 22.42 (18.74, 26.38) | 0.48 (0.37, 0.58) | 0.13(0.13,0.14) | 7612 (6397, 8848) | 28.28 (23.78, 32.90) | 23475 (19557, 27801) | 40.28 (33.55, 47.65) | 1.01 (0.87, 1.16) | 0.40(0.39,0.41) | 88700 (75003, 102807) | 337.84 (285.55, 391.99) | 208508 (174623, 245199) | 367.29 (307.70, 431.51) | 0.12 (0.04, 0.20) | 1.09(0.95,1.24) | 3937 (3329, 4570) | 16.56 (13.99, 19.26) | 9662 (8102, 11347) | 18.60 (15.60, 21.83) | 0.25 (0.16, 0.34) | 0.07(0.07,0.08) |
| 9 | Andean Latin America | 159 (130, 194) | 6.93 (5.68, 8.47) | 582 (444, 758) | 8.20 (6.25, 10.66) | 0.62 (0.45, 0.78) | 0.05(0.04,0.06) | 286 (232, 351) | 12.07 (9.82, 14.84) | 1511 (1133, 1992) | 21.01 (15.77, 27.69) | 2.00 (1.83, 2.17) | 0.29(0.28,0.31) | 2583 (2113, 3156) | 110.38 (90.41, 134.76) | 7179 (5468, 9222) | 100.36 (76.47, 128.83) | -0.27 (-0.42, -0.12) | -0.21(-0.31,-0.12) | 133 (109, 162) | 5.90 (4.85, 7.19) | 385 (295, 491) | 5.46 (4.18, 6.96) | -0.18 (-0.31, -0.05) | -0.01(-0.02,-0.00) |
| 10 | Australasia | 1094 (916, 1301) | 35.37 (29.58, 42.08) | 2458 (1967, 3003) | 34.32 (27.50, 41.91) | -0.16 (-0.42, 0.10) | -0.05(-0.12,0.03) | 4875 (4076, 5826) | 155.93 (130.32, 186.44) | 12620 (10095, 15555) | 179.85 (144.00, 221.59) | 0.43 (0.20, 0.65) | 0.73(0.48,0.98) | 6782 (5863, 7782) | 219.52 (189.57, 251.87) | 11393 (9599, 13373) | 160.81 (135.89, 188.61) | -1.02 (-1.32, -0.71) | -2.08(-2.49,-1.68) | 319 (276, 363) | 10.51 (9.07, 11.96) | 597 (497, 697) | 8.05 (6.73, 9.38) | -0.84 (-1.14, -0.53) | -0.08(-0.09,-0.07) |
| 11 | Caribbean | 694 (615, 780) | 21.98 (19.45, 24.69) | 1373 (1135, 1634) | 20.42 (16.87, 24.30) | 0.02 (-0.10, 0.14) | -0.05(-0.07,-0.03) | 1674 (1470, 1900) | 51.57 (45.28, 58.51) | 3924 (3220, 4699) | 58.58 (48.07, 70.16) | 0.78 (0.62, 0.93) | 0.23(0.16,0.31) | 9345 (8364, 10470) | 292.93 (261.99, 328.22) | 16625 (13734, 19730) | 247.49 (204.47, 293.73) | -0.28 (-0.41, -0.16) | -1.40(-1.66,-1.14) | 475 (425, 531) | 15.38 (13.76, 17.20) | 855 (709, 1011) | 12.64 (10.49, 14.95) | -0.38 (-0.49, -0.26) | -0.09(-0.10,-0.07) |
| 12 | Central Asia | 663 (592, 736) | 11.85 (10.53, 13.20) | 1130 (983, 1295) | 11.93 (10.38, 13.65) | 0.16 (-0.11, 0.44) | -0.02(-0.05,0.00) | 1499 (1339, 1668) | 26.00 (23.14, 28.97) | 3009 (2609, 3440) | 30.21 (26.20, 34.51) | 0.69 (0.30, 1.08) | 0.09(0.04,0.14) | 11258 (10174, 12417) | 194.61 (175.12, 215.27) | 17217 (15007, 19785) | 172.31 (150.32, 197.47) | -0.31 (-0.50, -0.12) | -0.74(-1.10,-0.38) | 513 (457, 570) | 9.32 (8.24, 10.41) | 777 (677, 890) | 8.42 (7.35, 9.63) | -0.24 (-0.45, -0.04) | -0.03(-0.05,-0.01) |
| 13 | Central Europe | 3281 (3048, 3511) | 17.10 (15.85, 18.32) | 7558 (6774, 8294) | 25.26 (22.65, 27.73) | 1.31 (1.24, 1.38) | 0.27(0.25,0.29) | 8374 (7748, 9028) | 41.81 (38.63, 45.11) | 25616 (22830, 28274) | 86.17 (76.79, 95.09) | 2.43 (2.35, 2.50) | 1.45(1.41,1.49) | 49265 (45939, 52546) | 249.54 (232.21, 266.38) | 88818 (80653, 96755) | 301.29 (273.60, 328.26) | 0.63 (0.56, 0.70) | 1.72(1.51,1.93) | 2307 (2147, 2462) | 12.41 (11.49, 13.26) | 4232 (3825, 4604) | 14.11 (12.76, 15.36) | 0.45 (0.36, 0.54) | 0.06(0.05,0.07) |
| 14 | Central Latin America | 936 (874, 991) | 10.31 (9.58, 10.92) | 2866 (2499, 3235) | 9.52 (8.29, 10.73) | -0.44 (-0.55, -0.33) | -0.03(-0.03,-0.02) | 1887 (1759, 2010) | 19.73 (18.35, 21.03) | 7616 (6608, 8650) | 24.78 (21.49, 28.14) | 0.60 (0.51, 0.70) | 0.15(0.14,0.16) | 14162 (13341, 14924) | 151.39 (142.13, 159.68) | 35662 (31257, 40150) | 116.71 (102.26, 131.33) | -1.01 (-1.13, -0.90) | -1.25(-1.33,-1.17) | 730 (684, 771) | 8.30 (7.73, 8.78) | 1876 (1636, 2108) | 6.30 (5.49, 7.07) | -1.02 (-1.13, -0.91) | -0.07(-0.07,-0.07) |
| 15 | Central Sub-Saharan Africa | 227 (168, 310) | 9.94 (7.26, 13.59) | 595 (428, 803) | 11.10 (7.86, 15.23) | 0.33 (0.17, 0.48) | 0.04(0.04,0.04) | 379 (281, 518) | 14.65 (10.79, 19.94) | 1157 (829, 1553) | 19.35 (13.81, 26.11) | 0.90 (0.66, 1.14) | 0.15(0.15,0.16) | 4522 (3345, 6135) | 181.42 (133.11, 246.20) | 10984 (7854, 14820) | 189.95 (134.52, 258.87) | 0.14 (0.03, 0.25) | 0.30(0.26,0.33) | 198 (146, 267) | 9.22 (6.68, 12.57) | 490 (348, 666) | 9.70 (6.74, 13.47) | 0.15 (0.04, 0.26) | 0.02(0.02,0.02) |
| 16 | East Asia | 8239 (7043, 9459) | 8.51 (7.29, 9.75) | 39168 (31308, 48132) | 14.28 (11.44, 17.49) | 1.96 (1.78, 2.14) | 0.19(0.18,0.19) | 17342 (14965, 19772) | 16.21 (13.99, 18.46) | 127861 (103087, 156596) | 44.90 (36.22, 54.86) | 3.70 (3.54, 3.85) | 0.93(0.91,0.95) | 132984 (112938, 153603) | 129.90 (110.58, 149.62) | 373258 (298569, 459318) | 134.56 (107.82, 165.01) | 0.26 (0.13, 0.40) | 0.11(0.04,0.17) | 6145 (5235, 7080) | 6.74 (5.75, 7.73) | 18537 (14891, 22695) | 7.00 (5.63, 8.52) | 0.25 (0.13, 0.37) | 0.01(0.00,0.01) |
| 17 | Eastern Europe | 6320 (5890, 6844) | 17.04 (15.84, 18.44) | 11267 (10065, 12544) | 23.09 (20.63, 25.69) | 0.75 (0.62, 0.88) | 0.20(0.16,0.23) | 13340 (12217, 14732) | 35.16 (32.16, 38.83) | 28501 (25275, 32180) | 58.22 (51.63, 65.74) | 1.59 (1.42, 1.76) | 0.75(0.67,0.83) | 90657 (85450, 97041) | 238.48 (224.39, 255.13) | 127416 (114096, 141118) | 259.24 (232.21, 287.00) | -0.09 (-0.27, 0.08) | 0.93(0.58,1.29) | 3991 (3754, 4262) | 11.05 (10.36, 11.80) | 5659 (5070, 6243) | 11.69 (10.48, 12.89) | -0.18 (-0.35, -0.01) | 0.03(0.02,0.05) |
| 18 | Eastern Sub-Saharan Africa | 1295 (1102, 1509) | 15.91 (13.50, 18.54) | 2961 (2440, 3487) | 16.76 (13.86, 19.67) | 0.06 (-0.01, 0.13) | 0.03(0.02,0.03) | 2135 (1823, 2482) | 24.21 (20.64, 28.16) | 5746 (4705, 6828) | 30.15 (24.78, 35.70) | 0.63 (0.49, 0.77) | 0.19(0.19,0.20) | 25396 (21703, 29725) | 294.87 (251.53, 344.98) | 53007 (43373, 62722) | 284.97 (234.31, 336.14) | -0.21 (-0.25, -0.17) | -0.33(-0.37,-0.29) | 1127 (963, 1317) | 14.43 (12.27, 16.86) | 2417 (1992, 2848) | 14.23 (11.77, 16.70) | -0.13 (-0.17, -0.09) | -0.01(-0.01,-0.00) |
| 19 | High-income Asia Pacific | 3652 (3284, 4015) | 14.71 (13.16, 16.19) | 14656 (11747, 17198) | 21.82 (17.83, 25.45) | 1.19 (0.88, 1.49) | 0.25(0.22,0.28) | 10384 (9227, 11647) | 40.47 (35.89, 45.42) | 41283 (33391, 49121) | 68.33 (55.99, 80.69) | 1.84 (1.55, 2.12) | 0.95(0.88,1.03) | 27563 (25734, 28980) | 109.89 (102.03, 115.77) | 80598 (67932, 88906) | 123.16 (106.59, 134.58) | 0.06 (-0.29, 0.42) | 0.53(0.35,0.72) | 1368 (1261, 1440) | 5.72 (5.22, 6.04) | 5272 (4251, 5892) | 7.02 (5.86, 7.75) | 0.36 (0.01, 0.70) | 0.05(0.04,0.06) |
| 20 | High-income North America | 16214 (15070, 17053) | 34.74 (32.31, 36.53) | 27329 (24768, 29128) | 30.71 (27.88, 32.71) | -0.41 (-0.53, -0.30) | -0.14(-0.16,-0.12) | 74990 (70188, 78746) | 161.54 (151.35, 169.57) | 137903 (126779, 146237) | 156.09 (143.59, 165.49) | -0.09 (-0.17, -0.01) | -0.25(-0.33,-0.16) | 107069 (100877, 111660) | 232.31 (219.05, 242.21) | 145279 (133639, 154181) | 163.81 (151.01, 173.70) | -1.13 (-1.32, -0.94) | -2.30(-2.39,-2.21) | 5162 (4788, 5390) | 11.03 (10.23, 11.52) | 7330 (6581, 7795) | 8.12 (7.32, 8.63) | -0.98 (-1.15, -0.80) | -0.10(-0.10,-0.09) |
| 21 | North Africa and Middle East | 952 (786, 1123) | 5.35 (4.40, 6.34) | 3297 (2791, 3813) | 6.82 (5.76, 7.89) | 0.85 (0.79, 0.92) | 0.05(0.05,0.05) | 2015 (1674, 2361) | 10.33 (8.56, 12.12) | 9891 (8344, 11573) | 19.11 (16.11, 22.35) | 2.04 (1.96, 2.13) | 0.29(0.28,0.29) | 15094 (12496, 17806) | 80.14 (66.08, 94.75) | 38957 (33173, 44908) | 77.26 (65.69, 88.98) | -0.11 (-0.15, -0.07) | -0.09(-0.12,-0.07) | 722 (596, 853) | 4.28 (3.50, 5.08) | 1928 (1639, 2221) | 4.19 (3.55, 4.82) | -0.02 (-0.08, 0.04) | -0.00(-0.00,-0.00) |
| 22 | Oceania | 24 (17, 31) | 8.39 (6.19, 10.88) | 71 (53, 92) | 9.82 (7.36, 12.79) | 0.67 (0.57, 0.78) | 0.04(0.04,0.05) | 47 (35, 61) | 14.52 (10.79, 18.71) | 148 (112, 191) | 18.62 (14.17, 23.93) | 0.91 (0.78, 1.05) | 0.13(0.12,0.13) | 414 (298, 547) | 134.90 (97.85, 177.32) | 1179 (861, 1562) | 154.56 (113.56, 204.15) | 0.64 (0.55, 0.73) | 0.64(0.60,0.67) | 19 (14, 25) | 7.17 (5.23, 9.39) | 56 (41, 73) | 8.16 (6.01, 10.75) | 0.62 (0.53, 0.71) | 0.03(0.03,0.03) |
| 23 | South Asia | 22855 (19986, 25781) | 36.30 (31.54, 41.06) | 76523 (65569, 86621) | 44.00 (37.68, 49.86) | 0.43 (0.30, 0.56) | 0.28(0.26,0.30) | 40193 (35384, 45164) | 59.12 (51.84, 66.52) | 167772 (144206, 189592) | 91.39 (78.57, 103.31) | 1.25 (1.07, 1.42) | 1.10(1.06,1.14) | 431783 (378786, 487367) | 650.62 (567.94, 735.86) | 1204200 (1034494, 1365261) | 670.09 (575.67, 760.13) | -0.09 (-0.19, 0.01) | 0.86(0.46,1.25) | 19143 (16714, 21663) | 31.65 (27.43, 35.94) | 56063 (48215, 63526) | 33.38 (28.68, 37.89) | -0.01 (-0.12, 0.10) | 0.07(0.05,0.09) |
| 24 | Southeast Asia | 4913 (4219, 5671) | 18.17 (15.57, 21.00) | 15900 (13262, 18723) | 21.67 (17.99, 25.59) | 0.39 (0.34, 0.44) | 0.11(0.10,0.11) | 10772 (9193, 12509) | 36.68 (31.31, 42.61) | 45538 (37533, 54169) | 57.68 (47.44, 68.76) | 1.26 (1.16, 1.36) | 0.68(0.66,0.69) | 78814 (67856, 90952) | 277.78 (238.98, 320.72) | 207869 (175132, 241583) | 271.60 (228.25, 316.27) | -0.24 (-0.30, -0.18) | -0.22(-0.28,-0.17) | 3773 (3246, 4351) | 14.64 (12.55, 16.92) | 10243 (8569, 11942) | 14.69 (12.22, 17.18) | -0.14 (-0.20, -0.08) | 0.00(-0.00,0.00) |
| 25 | Southern Latin America | 788 (676, 914) | 13.46 (11.53, 15.59) | 1436 (1212, 1673) | 12.69 (10.72, 14.80) | 0.12 (-0.09, 0.33) | -0.01(-0.03,-0.00) | 1913 (1623, 2263) | 31.79 (26.96, 37.57) | 4306 (3627, 5043) | 38.44 (32.38, 45.03) | 0.91 (0.67, 1.15) | 0.23(0.19,0.28) | 10793 (9412, 12362) | 181.92 (158.51, 208.30) | 15634 (13449, 17975) | 139.26 (119.82, 160.16) | -0.54 (-0.75, -0.33) | -1.29(-1.49,-1.10) | 513 (447, 585) | 8.96 (7.79, 10.21) | 803 (685, 923) | 7.05 (6.01, 8.10) | -0.38 (-0.59, -0.17) | -0.06(-0.07,-0.05) |
| 26 | Southern Sub-Saharan Africa | 502 (361, 629) | 16.25 (11.74, 20.37) | 1176 (1028, 1334) | 17.57 (15.34, 19.94) | 0.12 (-0.03, 0.27) | 0.05(0.04,0.06) | 987 (702, 1249) | 30.29 (21.62, 38.31) | 2564 (2224, 2933) | 35.95 (31.19, 41.11) | 0.40 (0.32, 0.48) | 0.18(0.17,0.20) | 8445 (6055, 10564) | 263.55 (189.76, 329.61) | 18881 (16595, 21395) | 270.28 (237.46, 306.21) | -0.05 (-0.27, 0.18) | 0.32(0.15,0.49) | 394 (285, 493) | 13.17 (9.58, 16.46) | 855 (751, 967) | 13.29 (11.66, 15.03) | -0.10 (-0.33, 0.12) | 0.00(-0.00,0.01) |
| 27 | Tropical Latin America | 1697 (1560, 1835) | 16.44 (15.00, 17.79) | 5554 (4973, 6073) | 17.35 (15.49, 18.98) | 0.19 (0.12, 0.26) | 0.03(0.02,0.04) | 3519 (3227, 3814) | 32.00 (29.27, 34.70) | 14661 (13231, 16032) | 45.03 (40.57, 49.25) | 1.09 (1.02, 1.16) | 0.42(0.40,0.44) | 27425 (25361, 29507) | 255.29 (234.82, 274.90) | 75446 (68471, 81726) | 232.65 (210.74, 252.12) | -0.28 (-0.37, -0.20) | -0.77(-0.99,-0.56) | 1295 (1191, 1394) | 13.04 (11.87, 14.06) | 3659 (3265, 3978) | 11.54 (10.27, 12.56) | -0.31 (-0.40, -0.23) | -0.05(-0.07,-0.04) |
| 28 | Western Europe | 18357 (16802, 19909) | 24.14 (22.07, 26.20) | 32516 (28638, 35665) | 26.71 (23.79, 29.19) | 0.47 (0.37, 0.57) | 0.08(0.07,0.09) | 70520 (64593, 76832) | 93.50 (85.66, 101.92) | 145743 (129611, 159794) | 125.66 (112.63, 137.38) | 1.14 (1.07, 1.22) | 0.99(0.94,1.05) | 170984 (158743, 182425) | 227.64 (211.23, 243.04) | 211897 (189840, 229392) | 179.39 (162.59, 193.56) | -0.69 (-0.82, -0.56) | -1.68(-1.77,-1.60) | 8308 (7666, 8838) | 10.92 (10.05, 11.63) | 11387 (9928, 12368) | 8.80 (7.80, 9.51) | -0.61 (-0.75, -0.47) | -0.07(-0.08,-0.07) |
| 29 | Western Sub-Saharan Africa | 459 (374, 543) | 4.77 (3.89, 5.64) | 1253 (1028, 1508) | 6.23 (5.15, 7.44) | 0.87 (0.83, 0.91) | 0.05(0.05,0.05) | 765 (621, 905) | 7.37 (5.99, 8.71) | 2402 (1955, 2911) | 10.97 (8.99, 13.24) | 1.29 (1.19, 1.39) | 0.11(0.11,0.12) | 8436 (6866, 9930) | 83.51 (68.03, 98.33) | 21378 (17490, 25771) | 100.89 (83.17, 120.97) | 0.62 (0.57, 0.67) | 0.55(0.54,0.56) | 395 (322, 466) | 4.28 (3.49, 5.05) | 1008 (834, 1206) | 5.25 (4.38, 6.24) | 0.68 (0.63, 0.74) | 0.03(0.03,0.03) |
| Larynx cancer |  |  |  |  |  |  |  |  |  |  |  |  |  |  |  |  |  |  |  |  |  |  |  |  |  |
| 1 | Global | 74342 (69999, 78636) | 15.16 (14.24, 16.05) | 133796 (123281, 144787) | 12.25 (11.27, 13.25) | -0.83 (-0.91, -0.75) | -0.09(-0.10,-0.09) | 358270 (336628, 381552) | 72.20 (67.64, 77.11) | 715330 (663428, 771040) | 65.20 (60.41, 70.27) | -0.46 (-0.52, -0.40) | -0.23(-0.24,-0.22) | 1217748 (1135925, 1298853) | 243.91 (227.19, 260.31) | 1777074 (1642831, 1925591) | 161.75 (149.41, 175.25) | -1.51 (-1.59, -1.42) | -2.62(-2.66,-2.58) | 54180 (50352, 57913) | 11.31 (10.48, 12.10) | 82893 (76127, 89825) | 7.66 (7.03, 8.31) | -1.41 (-1.48, -1.34) | -0.12(-0.12,-0.11) |
| 2 | Male | 64636 (60649, 68719) | 29.78 (27.84, 31.72) | 114429 (104940, 124305) | 22.80 (20.84, 24.76) | -1.00 (-1.07, -0.92) |  | 309694 (290635, 330951) | 139.44 (130.16, 149.80) | 609134 (562823, 658838) | 119.94 (110.63, 129.72) | -0.61 (-0.67, -0.55) |  | 1066611 (994221, 1147684) | 474.92 (441.69, 511.51) | 1529901 (1407781, 1668956) | 300.01 (275.60, 327.19) | -1.66 (-1.75, -1.57) |  | 47087 (43752, 50663) | 22.63 (20.95, 24.39) | 70896 (65050, 77194) | 14.49 (13.25, 15.78) | -1.59 (-1.66, -1.51) |  |
| 3 | Female | 9706 (8084, 10658) | 3.63 (3.02, 3.99) | 19367 (16031, 22654) | 3.30 (2.73, 3.86) | -0.47 (-0.55, -0.39) |  | 48576 (42041, 52880) | 18.06 (15.61, 19.69) | 106197 (90235, 122088) | 18.10 (15.39, 20.81) | -0.15 (-0.22, -0.07) |  | 151137 (118246, 170236) | 56.03 (43.87, 63.10) | 247172 (201635, 295853) | 42.16 (34.40, 50.45) | -1.07 (-1.15, -1.00) |  | 7092 (5577, 7962) | 2.69 (2.12, 3.02) | 11997 (9681, 14353) | 2.04 (1.65, 2.44) | -1.05 (-1.12, -0.98) |  |
| 4 | High SDI | 25495 (24143, 26773) | 17.70 (16.76, 18.60) | 35143 (32218, 37399) | 12.93 (11.91, 13.74) | -1.18 (-1.25, -1.10) | -0.15(-0.16,-0.15) | 145820 (137478, 155280) | 101.37 (95.60, 107.94) | 227280 (210557, 241262) | 84.14 (78.19, 89.22) | -0.75 (-0.84, -0.66) | -0.58(-0.61,-0.54) | 270304 (256883, 283727) | 188.00 (178.63, 197.34) | 267502 (246677, 284700) | 98.97 (91.64, 105.18) | -2.26 (-2.39, -2.14) | -2.89(-2.93,-2.84) | 12391 (11708, 13021) | 8.57 (8.09, 9.00) | 13004 (11842, 13852) | 4.60 (4.22, 4.89) | -2.20 (-2.32, -2.08) | -0.13(-0.13,-0.13) |
| 5 | High-middle SDI | 22401 (20999, 23889) | 17.48 (16.34, 18.67) | 34537 (30552, 38731) | 13.40 (11.85, 15.02) | -1.03 (-1.11, -0.95) | -0.13(-0.14,-0.12) | 106751 (99648, 114643) | 82.13 (76.44, 88.48) | 193463 (172702, 215490) | 74.81 (66.78, 83.30) | -0.44 (-0.50, -0.37) | -0.24(-0.26,-0.21) | 384177 (361234, 409146) | 294.54 (276.32, 314.16) | 415101 (372300, 459802) | 160.69 (144.05, 177.98) | -2.24 (-2.35, -2.14) | -4.26(-4.41,-4.11) | 16814 (15757, 17944) | 13.47 (12.58, 14.41) | 19350 (17282, 21480) | 7.58 (6.76, 8.41) | -2.10 (-2.19, -2.01) | -0.19(-0.20,-0.19) |
| 6 | Middle SDI | 13653 (12263, 14887) | 11.60 (10.39, 12.64) | 36107 (31846, 40954) | 10.95 (9.64, 12.41) | -0.29 (-0.37, -0.20) | -0.02(-0.03,-0.02) | 56429 (50802, 61717) | 46.12 (41.43, 50.50) | 176641 (156129, 199514) | 52.51 (46.41, 59.25) | 0.33 (0.24, 0.43) | 0.20(0.19,0.22) | 275857 (247845, 300781) | 224.91 (201.85, 245.11) | 536504 (478646, 602012) | 160.40 (142.92, 179.92) | -1.24 (-1.30, -1.17) | -2.08(-2.15,-2.01) | 12420 (11152, 13540) | 10.98 (9.84, 11.96) | 25224 (22421, 28292) | 7.87 (6.98, 8.82) | -1.20 (-1.25, -1.14) | -0.10(-0.10,-0.10) |
| 7 | Low-middle SDI | 9611 (8075, 11402) | 13.77 (11.54, 16.36) | 21870 (19335, 25032) | 12.78 (11.28, 14.64) | -0.30 (-0.39, -0.21) | -0.02(-0.03,-0.02) | 37310 (31730, 43680) | 52.10 (44.22, 61.06) | 92941 (82896, 105353) | 53.13 (47.36, 60.25) | -0.01 (-0.11, 0.09) | 0.06(0.04,0.09) | 214695 (179809, 254988) | 295.88 (247.28, 351.69) | 429896 (379222, 494085) | 245.19 (216.08, 281.95) | -0.65 (-0.73, -0.58) | -1.46(-1.60,-1.31) | 9409 (7859, 11190) | 13.88 (11.55, 16.53) | 19559 (17220, 22506) | 11.72 (10.31, 13.50) | -0.59 (-0.66, -0.53) | -0.06(-0.07,-0.05) |
| 8 | Low SDI | 3077 (2420, 3838) | 11.92 (9.36, 14.88) | 5965 (5019, 7025) | 10.63 (8.94, 12.51) | -0.45 (-0.54, -0.35) | -0.04(-0.04,-0.03) | 11478 (9148, 14102) | 43.14 (34.40, 52.91) | 24093 (20600, 28044) | 41.64 (35.64, 48.43) | -0.21 (-0.30, -0.11) | -0.04(-0.06,-0.02) | 70833 (55898, 88325) | 262.42 (206.89, 327.32) | 125595 (105890, 147645) | 215.81 (181.89, 253.67) | -0.73 (-0.80, -0.65) | -1.48(-1.63,-1.33) | 3062 (2415, 3825) | 12.24 (9.63, 15.30) | 5641 (4759, 6621) | 10.38 (8.74, 12.18) | -0.58 (-0.66, -0.50) | -0.05(-0.06,-0.05) |
| 9 | Andean Latin America | 176 (142, 214) | 7.58 (6.13, 9.26) | 348 (257, 458) | 4.88 (3.61, 6.42) | -1.61 (-1.89, -1.33) | -0.08(-0.09,-0.07) | 654 (536, 797) | 27.74 (22.70, 33.81) | 1516 (1137, 1999) | 21.10 (15.83, 27.81) | -1.10 (-1.38, -0.82) | -0.18(-0.21,-0.15) | 3544 (2893, 4334) | 150.20 (122.47, 183.80) | 5691 (4216, 7465) | 79.32 (58.80, 104.01) | -2.26 (-2.51, -2.00) | -2.19(-2.33,-2.05) | 175 (143, 215) | 7.68 (6.23, 9.43) | 293 (218, 382) | 4.13 (3.07, 5.39) | -2.16 (-2.40, -1.92) | -0.11(-0.12,-0.10) |
| 10 | Australasia | 337 (292, 391) | 10.82 (9.38, 12.56) | 425 (350, 507) | 6.02 (4.96, 7.18) | -1.98 (-2.06, -1.89) | -0.16(-0.17,-0.15) | 1766 (1542, 2035) | 56.69 (49.48, 65.35) | 2632 (2241, 3061) | 37.69 (32.08, 43.90) | -1.38 (-1.45, -1.30) | -0.64(-0.69,-0.58) | 4748 (4050, 5573) | 152.41 (129.99, 178.80) | 4299 (3516, 5174) | 60.88 (49.86, 73.24) | -3.11 (-3.20, -3.02) | -3.06(-3.21,-2.92) | 216 (184, 254) | 6.98 (5.94, 8.19) | 227 (184, 276) | 3.10 (2.51, 3.75) | -2.77 (-2.87, -2.67) | -0.13(-0.14,-0.13) |
| 11 | Caribbean | 659 (578, 752) | 20.61 (18.08, 23.55) | 1475 (1204, 1797) | 22.00 (17.95, 26.80) | 0.32 (0.22, 0.43) | 0.05(0.02,0.09) | 2804 (2470, 3199) | 86.71 (76.36, 98.97) | 6986 (5742, 8506) | 104.40 (85.79, 127.14) | 0.74 (0.63, 0.85) | 0.60(0.40,0.79) | 11363 (10020, 12980) | 352.35 (310.49, 402.57) | 22031 (18111, 26702) | 328.77 (270.28, 398.51) | -0.10 (-0.20, 0.01) | -0.68(-1.11,-0.25) | 553 (486, 633) | 17.54 (15.39, 20.08) | 1070 (878, 1292) | 15.90 (13.05, 19.20) | -0.23 (-0.33, -0.13) | -0.05(-0.07,-0.02) |
| 12 | Central Asia | 855 (801, 911) | 14.56 (13.61, 15.52) | 783 (696, 875) | 7.75 (6.88, 8.65) | -1.98 (-2.19, -1.78) | -0.22(-0.24,-0.21) | 3632 (3402, 3889) | 60.91 (56.96, 65.35) | 3749 (3360, 4152) | 36.40 (32.65, 40.28) | -1.64 (-1.80, -1.48) | -0.80(-0.86,-0.75) | 18329 (17206, 19503) | 305.81 (286.68, 325.78) | 15015 (13369, 16845) | 145.01 (129.12, 162.57) | -2.42 (-2.66, -2.18) | -5.11(-5.46,-4.76) | 765 (716, 815) | 13.29 (12.42, 14.17) | 637 (567, 714) | 6.56 (5.83, 7.35) | -2.24 (-2.49, -1.98) | -0.22(-0.23,-0.20) |
| 13 | Central Europe | 3864 (3612, 4134) | 19.22 (17.94, 20.57) | 6119 (5504, 6776) | 20.67 (18.59, 22.89) | 0.18 (0.11, 0.26) | 0.07(0.05,0.08) | 17768 (16453, 19308) | 87.52 (80.90, 95.31) | 32792 (29797, 36043) | 111.30 (101.13, 122.38) | 0.79 (0.73, 0.86) | 0.75(0.69,0.81) | 75339 (70696, 80462) | 370.20 (347.11, 395.48) | 89838 (81535, 98668) | 303.74 (275.65, 333.66) | -0.76 (-0.84, -0.68) | -1.91(-2.20,-1.62) | 3247 (3042, 3471) | 16.46 (15.40, 17.61) | 4024 (3645, 4419) | 13.39 (12.13, 14.71) | -0.78 (-0.86, -0.69) | -0.09(-0.10,-0.08) |
| 14 | Central Latin America | 1288 (1212, 1361) | 13.88 (13.02, 14.68) | 2239 (1938, 2570) | 7.35 (6.36, 8.43) | -2.48 (-2.62, -2.34) | -0.22(-0.23,-0.21) | 5003 (4718, 5290) | 52.42 (49.35, 55.49) | 9923 (8637, 11369) | 32.21 (28.04, 36.87) | -2.01 (-2.16, -1.86) | -0.67(-0.71,-0.63) | 24748 (23330, 26116) | 260.00 (244.55, 274.48) | 36557 (31738, 41941) | 118.86 (103.23, 136.28) | -2.94 (-3.07, -2.82) | -4.73(-4.89,-4.57) | 1220 (1146, 1288) | 13.48 (12.61, 14.24) | 1829 (1587, 2094) | 6.09 (5.28, 6.96) | -2.95 (-3.07, -2.83) | -0.24(-0.25,-0.22) |
| 15 | Central Sub-Saharan Africa | 224 (150, 313) | 9.10 (6.17, 12.74) | 452 (320, 619) | 7.82 (5.52, 10.77) | -0.48 (-0.66, -0.31) | -0.04(-0.04,-0.04) | 804 (556, 1104) | 31.29 (22.01, 42.66) | 1766 (1285, 2354) | 29.25 (21.42, 38.95) | -0.19 (-0.38, -0.00) | -0.06(-0.07,-0.06) | 5249 (3498, 7376) | 200.12 (134.53, 280.80) | 10142 (7160, 13770) | 165.92 (117.08, 226.71) | -0.58 (-0.73, -0.44) | -1.07(-1.12,-1.03) | 223 (150, 313) | 9.52 (6.45, 13.36) | 432 (305, 589) | 7.80 (5.49, 10.74) | -0.63 (-0.78, -0.48) | -0.05(-0.06,-0.05) |
| 16 | East Asia | 9878 (8042, 11662) | 9.81 (8.00, 11.55) | 27966 (21855, 35423) | 10.05 (7.87, 12.70) | 0.19 (0.05, 0.34) | 0.00(0.00,0.01) | 41613 (34314, 48707) | 39.36 (32.51, 46.00) | 149264 (118147, 187273) | 52.59 (41.75, 65.86) | 1.11 (0.95, 1.27) | 0.42(0.40,0.43) | 192878 (156342, 228310) | 183.41 (149.00, 216.49) | 320417 (249150, 405325) | 114.40 (89.14, 144.30) | -1.52 (-1.62, -1.42) | -2.25(-2.33,-2.17) | 8731 (7089, 10283) | 9.10 (7.42, 10.69) | 15576 (12226, 19544) | 5.78 (4.55, 7.22) | -1.47 (-1.56, -1.39) | -0.11(-0.11,-0.11) |
| 17 | Eastern Europe | 6402 (6053, 6781) | 16.62 (15.70, 17.62) | 6496 (5754, 7264) | 13.22 (11.71, 14.77) | -1.27 (-1.47, -1.08) | -0.10(-0.11,-0.08) | 29365 (27530, 31461) | 75.67 (70.80, 81.27) | 34029 (30511, 37705) | 69.11 (62.01, 76.55) | -0.73 (-0.91, -0.56) | -0.16(-0.22,-0.10) | 124185 (117312, 131168) | 317.60 (299.87, 335.70) | 98426 (86958, 110654) | 199.38 (176.23, 224.09) | -2.13 (-2.36, -1.90) | -3.61(-3.96,-3.26) | 5060 (4778, 5350) | 13.36 (12.60, 14.14) | 4148 (3665, 4661) | 8.51 (7.52, 9.56) | -2.04 (-2.26, -1.82) | -0.15(-0.16,-0.13) |
| 18 | Eastern Sub-Saharan Africa | 766 (598, 943) | 8.98 (7.02, 11.04) | 1281 (1022, 1612) | 6.94 (5.53, 8.69) | -1.04 (-1.12, -0.96) | -0.07(-0.07,-0.07) | 2758 (2194, 3334) | 31.52 (25.14, 38.05) | 5124 (4138, 6416) | 27.02 (21.87, 33.62) | -0.66 (-0.72, -0.59) | -0.15(-0.16,-0.14) | 17686 (13865, 21739) | 199.04 (156.23, 244.40) | 27892 (22134, 35246) | 145.68 (115.71, 183.19) | -1.21 (-1.28, -1.14) | -1.76(-1.79,-1.73) | 766 (601, 942) | 9.24 (7.26, 11.34) | 1227 (977, 1538) | 6.85 (5.45, 8.54) | -1.16 (-1.23, -1.09) | -0.08(-0.08,-0.08) |
| 19 | High-income Asia Pacific | 3165 (2779, 3547) | 12.48 (10.95, 13.98) | 5150 (4290, 5962) | 8.36 (6.99, 9.69) | -1.57 (-1.77, -1.37) | -0.13(-0.14,-0.12) | 18919 (16764, 21148) | 73.92 (65.47, 82.68) | 34457 (29438, 39353) | 57.10 (48.74, 65.41) | -1.05 (-1.26, -0.83) | -0.54(-0.60,-0.48) | 27257 (23601, 30771) | 107.37 (92.99, 121.10) | 27073 (23118, 30796) | 43.16 (37.03, 49.26) | -3.38 (-3.55, -3.22) | -2.03(-2.09,-1.96) | 1289 (1120, 1444) | 5.26 (4.56, 5.88) | 1528 (1282, 1732) | 2.18 (1.85, 2.48) | -3.30 (-3.48, -3.13) | -0.10(-0.10,-0.09) |
| 20 | High-income North America | 9526 (9007, 9951) | 20.69 (19.58, 21.61) | 13424 (12418, 14187) | 15.22 (14.09, 16.07) | -1.36 (-1.50, -1.22) | -0.19(-0.20,-0.18) | 57576 (54301, 60948) | 125.46 (118.44, 132.67) | 87896 (82052, 92921) | 99.79 (93.22, 105.44) | -1.09 (-1.25, -0.94) | -0.88(-0.94,-0.83) | 79908 (76009, 83327) | 173.94 (165.53, 181.32) | 89688 (83515, 94806) | 101.76 (94.84, 107.51) | -2.06 (-2.16, -1.97) | -2.38(-2.46,-2.30) | 3624 (3423, 3773) | 7.75 (7.32, 8.07) | 4188 (3841, 4431) | 4.69 (4.31, 4.96) | -1.93 (-2.01, -1.84) | -0.10(-0.11,-0.10) |
| 21 | North Africa and Middle East | 2865 (2333, 3540) | 15.16 (12.29, 18.85) | 7483 (6301, 8794) | 14.76 (12.40, 17.36) | -0.12 (-0.20, -0.04) | -0.01(-0.01,-0.01) | 12142 (10065, 14747) | 61.99 (51.30, 75.46) | 38581 (32862, 45165) | 74.00 (63.08, 86.54) | 0.53 (0.47, 0.59) | 0.40(0.39,0.41) | 55706 (45348, 68883) | 282.87 (229.51, 351.12) | 101386 (85627, 118656) | 195.55 (164.92, 228.70) | -1.27 (-1.33, -1.20) | -2.84(-2.88,-2.79) | 2521 (2047, 3123) | 13.90 (11.21, 17.36) | 4766 (4020, 5571) | 9.89 (8.31, 11.54) | -1.15 (-1.21, -1.08) | -0.13(-0.13,-0.13) |
| 22 | Oceania | 11 (8, 15) | 3.74 (2.72, 5.20) | 25 (18, 34) | 3.39 (2.43, 4.78) | -0.37 (-0.41, -0.32) | -0.01(-0.01,-0.01) | 44 (32, 59) | 13.99 (10.48, 18.78) | 101 (75, 138) | 13.19 (9.81, 17.95) | -0.25 (-0.30, -0.20) | -0.02(-0.03,-0.02) | 224 (160, 313) | 71.78 (51.46, 100.29) | 483 (348, 679) | 62.95 (45.18, 88.74) | -0.45 (-0.48, -0.41) | -0.28(-0.31,-0.25) | 10 (7, 14) | 3.69 (2.65, 5.16) | 23 (16, 32) | 3.28 (2.34, 4.64) | -0.40 (-0.44, -0.37) | -0.01(-0.01,-0.01) |
| 23 | South Asia | 11182 (9203, 13401) | 17.20 (14.08, 20.66) | 27051 (23366, 31270) | 15.13 (13.06, 17.50) | -0.60 (-0.74, -0.46) | -0.06(-0.07,-0.05) | 43402 (36294, 51360) | 64.88 (54.08, 76.92) | 116260 (101467, 133463) | 63.65 (55.56, 73.06) | -0.27 (-0.42, -0.11) | -0.00(-0.03,0.03) | 252985 (208565, 303380) | 373.20 (306.46, 448.33) | 530514 (457312, 614720) | 290.09 (249.94, 336.24) | -0.99 (-1.11, -0.87) | -2.46(-2.64,-2.27) | 10943 (8971, 13139) | 17.37 (14.16, 20.91) | 24028 (20703, 27848) | 13.80 (11.88, 16.00) | -0.91 (-1.02, -0.80) | -0.11(-0.11,-0.10) |
| 24 | Southeast Asia | 2334 (1957, 2749) | 8.17 (6.83, 9.64) | 6693 (5581, 8102) | 8.57 (7.13, 10.40) | 0.06 (0.02, 0.11) | 0.01(0.01,0.02) | 9713 (8249, 11298) | 33.02 (28.01, 38.44) | 32068 (26960, 38543) | 39.92 (33.57, 47.99) | 0.54 (0.49, 0.60) | 0.22(0.21,0.24) | 46295 (38931, 54388) | 156.46 (131.31, 184.03) | 105775 (88396, 127104) | 132.19 (110.42, 159.09) | -0.63 (-0.66, -0.60) | -0.78(-0.83,-0.74) | 2088 (1751, 2458) | 7.57 (6.33, 8.93) | 4823 (4030, 5805) | 6.47 (5.39, 7.81) | -0.60 (-0.63, -0.57) | -0.04(-0.04,-0.03) |
| 25 | Southern Latin America | 1155 (986, 1337) | 19.36 (16.52, 22.42) | 1358 (1138, 1606) | 12.09 (10.14, 14.31) | -1.51 (-1.67, -1.35) | -0.21(-0.22,-0.20) | 5464 (4724, 6300) | 90.97 (78.62, 104.96) | 7423 (6408, 8599) | 66.28 (57.19, 76.84) | -1.08 (-1.26, -0.89) | -0.68(-0.73,-0.63) | 21045 (18053, 24375) | 349.65 (299.84, 405.01) | 19665 (16596, 23121) | 175.73 (148.35, 206.59) | -2.18 (-2.33, -2.03) | -5.23(-5.42,-5.03) | 939 (804, 1088) | 15.94 (13.65, 18.49) | 938 (785, 1102) | 8.28 (6.94, 9.73) | -2.02 (-2.16, -1.88) | -0.23(-0.24,-0.22) |
| 26 | Southern Sub-Saharan Africa | 313 (251, 419) | 9.82 (7.87, 13.11) | 666 (581, 755) | 9.53 (8.30, 10.81) | -0.26 (-0.51, -0.01) | -0.01(-0.02,-0.01) | 1339 (1083, 1768) | 41.37 (33.50, 54.44) | 2856 (2524, 3222) | 39.97 (35.30, 45.10) | -0.22 (-0.35, -0.09) | -0.03(-0.06,0.00) | 6563 (5260, 8780) | 200.38 (160.78, 267.61) | 13403 (11684, 15193) | 186.49 (162.46, 211.53) | -0.37 (-0.68, -0.07) | -0.49(-0.62,-0.37) | 292 (235, 389) | 9.39 (7.56, 12.48) | 581 (506, 658) | 8.57 (7.46, 9.72) | -0.46 (-0.75, -0.17) | -0.03(-0.03,-0.02) |
| 27 | Tropical Latin America | 1673 (1545, 1803) | 15.48 (14.24, 16.70) | 4657 (4177, 5120) | 14.38 (12.88, 15.81) | -0.20 (-0.28, -0.11) | -0.03(-0.04,-0.01) | 6800 (6303, 7322) | 61.33 (56.72, 66.14) | 21682 (19631, 23781) | 66.42 (60.10, 72.85) | 0.26 (0.17, 0.35) | 0.20(0.15,0.26) | 33931 (31442, 36444) | 305.75 (282.51, 328.73) | 79784 (72226, 87151) | 244.58 (221.23, 267.21) | -0.68 (-0.76, -0.59) | -1.84(-2.13,-1.56) | 1516 (1398, 1631) | 14.41 (13.22, 15.53) | 3668 (3298, 4015) | 11.46 (10.29, 12.55) | -0.65 (-0.74, -0.57) | -0.09(-0.10,-0.08) |
| 28 | Western Europe | 17017 (15786, 18265) | 22.57 (20.94, 24.23) | 18300 (16278, 20177) | 15.77 (14.10, 17.38) | -1.16 (-1.28, -1.03) | -0.22(-0.23,-0.20) | 94225 (87257, 102381) | 125.65 (116.43, 136.43) | 120611 (109341, 132038) | 105.15 (95.50, 115.17) | -0.60 (-0.69, -0.51) | -0.65(-0.70,-0.59) | 200858 (187709, 213663) | 267.20 (249.76, 284.17) | 148997 (133519, 163032) | 128.32 (115.65, 140.26) | -2.41 (-2.58, -2.24) | -4.45(-4.52,-4.38) | 9349 (8724, 9950) | 12.20 (11.38, 12.98) | 7541 (6670, 8273) | 6.01 (5.36, 6.58) | -2.32 (-2.48, -2.16) | -0.20(-0.20,-0.19) |
| 29 | Western Sub-Saharan Africa | 652 (515, 812) | 6.39 (5.08, 7.92) | 1403 (1116, 1693) | 6.67 (5.33, 8.01) | 0.32 (0.21, 0.42) | 0.01(0.01,0.01) | 2481 (1985, 3054) | 23.69 (19.05, 29.05) | 5613 (4498, 6727) | 25.69 (20.73, 30.65) | 0.42 (0.34, 0.51) | 0.07(0.06,0.07) | 14905 (11734, 18675) | 140.89 (111.43, 175.75) | 29996 (23991, 36402) | 136.23 (109.39, 164.65) | 0.06 (-0.06, 0.17) | -0.20(-0.24,-0.15) | 651 (518, 811) | 6.55 (5.24, 8.10) | 1347 (1083, 1627) | 6.65 (5.37, 7.99) | 0.24 (0.13, 0.36) | 0.00(0.00,0.00) |
| Other pharynx cancer |  |  |  |  |  |  |  |  |  |  |  |  |  |  |  |  |  |  |  |  |  |  |  |  |  |
| 1 | Global | 31276 (29069, 33528) | 6.30 (5.84, 6.76) | 96447 (89356, 103106) | 8.79 (8.13, 9.40) | 1.09 (1.00, 1.19) | 0.08(0.07,0.09) | 37386 (35577, 39156) | 7.38 (7.01, 7.74) | 163973 (153606, 173894) | 14.80 (13.86, 15.70) | 2.49 (2.37, 2.62) | 0.24(0.23,0.25) | 546598 (500214, 597783) | 107.89 (98.66, 118.00) | 1343755 (1231691, 1457195) | 121.78 (111.57, 132.07) | 0.32 (0.24, 0.39) | 0.53(0.47,0.60) | 23678 (21635, 25868) | 4.85 (4.42, 5.30) | 60769 (55516, 65904) | 5.58 (5.09, 6.05) | 0.41 (0.33, 0.48) | 0.03(0.02,0.03) |
| 2 | Male | 24641 (22695, 26797) | 10.95 (10.07, 11.91) | 77486 (71678, 83493) | 15.17 (14.01, 16.35) | 1.06 (0.96, 1.17) |  | 28757 (27256, 30308) | 12.38 (11.72, 13.06) | 129415 (121397, 137838) | 24.80 (23.23, 26.43) | 2.49 (2.36, 2.62) |  | 440824 (398293, 490561) | 189.38 (171.00, 210.66) | 1102329 (1003014, 1208684) | 212.70 (193.41, 233.17) | 0.29 (0.21, 0.38) |  | 18780 (16956, 20863) | 8.58 (7.74, 9.52) | 49193 (44708, 53913) | 9.80 (8.89, 10.74) | 0.38 (0.29, 0.46) |  |
| 3 | Female | 6635 (5796, 7510) | 2.48 (2.16, 2.81) | 18961 (16175, 22591) | 3.23 (2.76, 3.85) | 0.91 (0.83, 0.99) |  | 8629 (7976, 9235) | 3.17 (2.93, 3.40) | 34557 (30706, 38360) | 5.91 (5.25, 6.55) | 2.23 (2.11, 2.36) |  | 105774 (88895, 124544) | 39.11 (32.87, 46.02) | 241426 (202824, 300498) | 41.27 (34.68, 51.36) | 0.16 (0.12, 0.21) |  | 4898 (4134, 5740) | 1.86 (1.57, 2.17) | 11575 (9646, 14360) | 1.97 (1.64, 2.45) | 0.20 (0.15, 0.25) |  |
| 4 | High SDI | 11976 (11258, 12628) | 8.34 (7.84, 8.80) | 37042 (34071, 39646) | 13.79 (12.73, 14.74) | 1.78 (1.68, 1.88) | 0.17(0.16,0.19) | 24567 (23367, 25706) | 17.22 (16.38, 18.02) | 107893 (100007, 115205) | 41.25 (38.31, 44.02) | 3.15 (3.03, 3.27) | 0.77(0.74,0.80) | 134046 (125402, 141672) | 93.81 (87.70, 99.18) | 294817 (271743, 315631) | 110.85 (102.47, 118.63) | 0.58 (0.46, 0.69) | 0.51(0.45,0.56) | 6015 (5608, 6354) | 4.18 (3.89, 4.42) | 14124 (12870, 15143) | 5.10 (4.67, 5.46) | 0.70 (0.58, 0.82) | 0.03(0.03,0.03) |
| 5 | High-middle SDI | 6304 (5873, 6794) | 4.85 (4.51, 5.24) | 16106 (14589, 17640) | 6.23 (5.64, 6.82) | 0.66 (0.51, 0.81) | 0.04(0.04,0.05) | 5224 (4873, 5604) | 3.93 (3.66, 4.22) | 25015 (22440, 27739) | 9.63 (8.64, 10.68) | 2.94 (2.75, 3.13) | 0.18(0.18,0.19) | 115358 (107143, 124930) | 87.24 (80.93, 94.53) | 207542 (188440, 226626) | 80.17 (72.74, 87.55) | -0.53 (-0.67, -0.38) | -0.17(-0.24,-0.09) | 4957 (4596, 5366) | 3.91 (3.61, 4.23) | 9198 (8328, 10052) | 3.58 (3.24, 3.91) | -0.51 (-0.65, -0.37) |  |
| 6 | Middle SDI | 5475 (4950, 6043) | 4.52 (4.08, 5.00) | 19118 (16911, 21508) | 5.71 (5.05, 6.42) | 0.53 (0.39, 0.67) | 0.04(0.04,0.04) | 3298 (2983, 3634) | 2.68 (2.42, 2.96) | 16047 (14125, 18091) | 4.71 (4.15, 5.31) | 1.62 (1.39, 1.86) | 0.07(0.07,0.07) | 119214 (107790, 131567) | 94.35 (85.27, 104.24) | 333307 (295235, 375264) | 97.97 (86.75, 110.26) | -0.15 (-0.27, -0.03) | 0.15(0.12,0.19) | 5201 (4704, 5745) | 4.43 (4.00, 4.90) | 15011 (13298, 16889) | 4.57 (4.04, 5.14) | -0.12 (-0.22, -0.01) | 0.01(0.00,0.01) |
| 7 | Low-middle SDI | 6028 (4842, 7372) | 8.32 (6.66, 10.19) | 19844 (16899, 22996) | 11.38 (9.69, 13.20) | 1.08 (1.01, 1.15) | 0.11(0.10,0.11) | 3442 (2773, 4201) | 4.70 (3.78, 5.75) | 12339 (10521, 14306) | 6.99 (5.96, 8.11) | 1.34 (1.24, 1.43) | 0.08(0.07,0.08) | 142512 (114602, 174825) | 189.78 (152.27, 233.08) | 415026 (353694, 482420) | 232.41 (198.03, 270.22) | 0.73 (0.67, 0.79) | 1.54(1.41,1.68) | 6013 (4823, 7383) | 8.47 (6.77, 10.41) | 18355 (15643, 21349) | 10.73 (9.14, 12.48) | 0.84 (0.78, 0.90) | 0.08(0.07,0.09) |
| 8 | Low SDI | 1456 (1092, 1914) | 5.44 (4.09, 7.15) | 4234 (3276, 5370) | 7.34 (5.69, 9.29) | 1.11 (0.98, 1.23) | 0.07(0.06,0.07) | 825 (619, 1083) | 3.05 (2.29, 4.00) | 2546 (1971, 3217) | 4.35 (3.37, 5.49) | 1.27 (1.13, 1.41) | 0.04(0.04,0.05) | 34780 (26102, 45980) | 124.93 (93.82, 164.97) | 91628 (70748, 116219) | 153.66 (118.78, 194.72) | 0.80 (0.69, 0.90) | 1.02(0.93,1.11) | 1462 (1099, 1930) | 5.60 (4.21, 7.38) | 4016 (3104, 5087) | 7.13 (5.52, 9.01) | 0.94 (0.84, 1.05) | 0.05(0.05,0.05) |
| 9 | Andean Latin America | 50 (40, 62) | 2.14 (1.71, 2.66) | 118 (89, 153) | 1.64 (1.25, 2.13) | -0.93 (-1.34, -0.52) | -0.01(-0.01,-0.01) | 29 (23, 36) | 1.23 (0.98, 1.53) | 90 (68, 119) | 1.25 (0.94, 1.65) | -0.03 (-0.52, 0.45) | 0.00(0.00,0.00) | 1044 (838, 1298) | 43.77 (35.16, 54.41) | 1956 (1483, 2560) | 27.15 (20.60, 35.52) | -1.65 (-2.04, -1.26) | -0.48(-0.52,-0.43) | 50 (41, 62) | 2.18 (1.76, 2.71) | 98 (75, 128) | 1.38 (1.06, 1.80) | -1.55 (-1.93, -1.17) | -0.02(-0.02,-0.02) |
| 10 | Australasia | 393 (322, 469) | 12.58 (10.31, 15.05) | 1099 (847, 1403) | 15.88 (12.24, 20.29) | 0.55 (0.15, 0.96) | 0.10(0.07,0.13) | 1143 (916, 1391) | 36.62 (29.31, 44.56) | 4621 (3513, 5900) | 67.90 (51.65, 86.74) | 1.80 (1.45, 2.16) | 1.01(0.90,1.12) | 3140 (2617, 3715) | 100.99 (84.04, 119.64) | 5810 (4555, 7248) | 84.52 (66.36, 105.48) | -0.77 (-1.23, -0.32) | -0.60(-0.69,-0.51) | 138 (116, 162) | 4.45 (3.73, 5.24) | 272 (213, 336) | 3.81 (3.00, 4.72) | -0.70 (-1.14, -0.26) | -0.03(-0.03,-0.02) |
| 11 | Caribbean | 277 (242, 319) | 8.76 (7.62, 10.08) | 486 (396, 587) | 7.23 (5.89, 8.73) | -0.33 (-0.74, 0.08) | -0.04(-0.05,-0.03) | 188 (163, 218) | 5.89 (5.10, 6.83) | 416 (335, 510) | 6.21 (5.00, 7.60) | 0.49 (0.08, 0.91) | 0.02(0.01,0.02) | 5043 (4384, 5824) | 157.43 (136.78, 181.85) | 7875 (6401, 9566) | 117.44 (95.46, 142.66) | -0.66 (-1.07, -0.26) | -1.12(-1.25,-1.00) | 247 (216, 284) | 7.95 (6.94, 9.12) | 387 (316, 470) | 5.74 (4.69, 6.96) | -0.77 (-1.17, -0.38) | -0.06(-0.07,-0.06) |
| 12 | Central Asia | 237 (212, 274) | 4.12 (3.67, 4.80) | 353 (307, 402) | 3.55 (3.09, 4.04) | -0.46 (-0.68, -0.24) | -0.02(-0.03,-0.01) | 146 (131, 168) | 2.51 (2.24, 2.90) | 246 (214, 280) | 2.40 (2.09, 2.73) | -0.10 (-0.34, 0.14) | -0.00(-0.01,0.00) | 5081 (4559, 5820) | 85.83 (76.80, 98.96) | 6898 (6000, 7908) | 66.71 (58.09, 76.37) | -0.82 (-1.04, -0.60) | -0.66(-0.82,-0.50) | 220 (196, 257) | 3.90 (3.46, 4.60) | 299 (260, 342) | 3.10 (2.70, 3.54) | -0.74 (-0.96, -0.52) | -0.03(-0.03,-0.02) |
| 13 | Central Europe | 1280 (1184, 1379) | 6.36 (5.88, 6.85) | 4402 (3948, 4908) | 14.94 (13.41, 16.67) | 2.97 (2.84, 3.09) | 0.27(0.27,0.28) | 910 (843, 982) | 4.47 (4.14, 4.82) | 5317 (4740, 5934) | 18.24 (16.26, 20.37) | 4.92 (4.78, 5.05) | 0.44(0.44,0.45) | 24969 (23073, 27008) | 121.90 (112.66, 131.80) | 63157 (56631, 70372) | 216.65 (194.30, 241.52) | 2.02 (1.90, 2.14) | 3.01(2.89,3.13) | 1071 (990, 1156) | 5.40 (4.99, 5.83) | 2754 (2462, 3065) | 9.29 (8.31, 10.35) | 1.90 (1.76, 2.04) | 0.13(0.12,0.14) |
| 14 | Central Latin America | 246 (229, 261) | 2.63 (2.45, 2.80) | 672 (587, 767) | 2.20 (1.92, 2.51) | -0.86 (-1.08, -0.64) | -0.02(-0.02,-0.01) | 148 (138, 158) | 1.57 (1.46, 1.67) | 507 (442, 580) | 1.64 (1.43, 1.88) | -0.18 (-0.42, 0.06) | 0.00(0.00,0.00) | 4896 (4582, 5206) | 51.02 (47.64, 54.29) | 11228 (9817, 12839) | 36.36 (31.79, 41.54) | -1.37 (-1.60, -1.15) | -0.52(-0.57,-0.46) | 238 (222, 254) | 2.61 (2.42, 2.78) | 560 (488, 639) | 1.85 (1.62, 2.11) | -1.35 (-1.57, -1.13) | -0.02(-0.03,-0.02) |
| 15 | Central Sub-Saharan Africa | 36 (25, 50) | 1.43 (1.00, 1.97) | 87 (59, 126) | 1.51 (1.03, 2.17) | 0.29 (0.09, 0.50) | 0.00(0.00,0.00) | 20 (14, 28) | 0.79 (0.55, 1.09) | 51 (35, 73) | 0.86 (0.59, 1.24) | 0.40 (0.17, 0.62) | 0.00(0.00,0.00) | 864 (604, 1194) | 32.17 (22.57, 44.34) | 1990 (1345, 2894) | 32.29 (21.88, 46.88) | 0.15 (-0.04, 0.34) | 0.00(-0.00,0.01) | 36 (26, 50) | 1.51 (1.06, 2.08) | 85 (58, 123) | 1.53 (1.03, 2.22) | 0.19 (0.00, 0.37) | 0.00(0.00,0.00) |
| 16 | East Asia | 2832 (2342, 3415) | 2.78 (2.31, 3.34) | 8079 (6468, 10037) | 2.91 (2.33, 3.60) | -0.17 (-0.52, 0.19) | 0.00(0.00,0.01) | 1782 (1480, 2139) | 1.71 (1.42, 2.04) | 12481 (9947, 15609) | 4.36 (3.48, 5.45) | 3.10 (2.60, 3.61) | 0.09(0.08,0.09) | 58233 (47717, 70669) | 54.53 (44.90, 65.93) | 94042 (75174, 117119) | 33.65 (26.94, 41.83) | -2.03 (-2.37, -1.69) | -0.69(-0.72,-0.66) | 2610 (2151, 3151) | 2.67 (2.22, 3.21) | 4561 (3665, 5637) | 1.69 (1.36, 2.09) | -1.93 (-2.25, -1.61) | -0.03(-0.03,-0.03) |
| 17 | Eastern Europe | 2377 (2166, 2651) | 6.11 (5.56, 6.81) | 5792 (5126, 6516) | 11.69 (10.35, 13.14) | 2.08 (1.89, 2.27) | 0.17(0.15,0.19) | 1997 (1827, 2220) | 5.01 (4.58, 5.57) | 8068 (7138, 8973) | 16.10 (14.25, 17.91) | 4.05 (3.57, 4.54) | 0.40(0.37,0.43) | 43963 (39993, 49168) | 111.46 (101.45, 124.51) | 81942 (72168, 93276) | 164.90 (145.32, 187.61) | 1.12 (0.98, 1.26) | 1.75(1.49,2.02) | 1796 (1636, 2002) | 4.70 (4.29, 5.24) | 3373 (2975, 3824) | 6.87 (6.06, 7.78) | 1.09 (0.96, 1.23) | 0.06(0.05,0.07) |
| 18 | Eastern Sub-Saharan Africa | 266 (203, 329) | 3.03 (2.32, 3.74) | 609 (429, 810) | 3.20 (2.26, 4.23) | 0.12 (0.09, 0.15) | 0.01(0.00,0.01) | 151 (115, 186) | 1.70 (1.30, 2.10) | 362 (254, 481) | 1.87 (1.32, 2.48) | 0.26 (0.21, 0.30) | 0.01(0.01,0.01) | 6342 (4837, 7869) | 69.52 (53.17, 86.11) | 13749 (9672, 18458) | 69.63 (49.11, 93.02) | -0.05 (-0.07, -0.02) | 0.00(-0.01,0.02) | 267 (204, 331) | 3.12 (2.39, 3.85) | 585 (413, 780) | 3.15 (2.23, 4.16) | -0.00 (-0.02, 0.02) | 0.00(0.00,0.00) |
| 19 | High-income Asia Pacific | 1081 (989, 1181) | 4.21 (3.85, 4.60) | 7805 (6803, 8758) | 13.13 (11.52, 14.72) | 3.72 (3.37, 4.08) | 0.28(0.28,0.29) | 1736 (1500, 1997) | 6.65 (5.74, 7.64) | 18640 (15621, 21893) | 33.92 (28.54, 39.72) | 5.42 (4.92, 5.92) | 0.87(0.84,0.90) | 12901 (12117, 13654) | 49.93 (46.81, 52.88) | 62039 (55859, 67150) | 106.39 (96.48, 115.25) | 2.42 (2.11, 2.73) | 1.78(1.72,1.83) | 589 (551, 623) | 2.34 (2.18, 2.47) | 3382 (2998, 3666) | 5.29 (4.75, 5.73) | 2.63 (2.35, 2.91) | 0.09(0.09,0.10) |
| 20 | High-income North America | 4724 (4467, 4920) | 10.30 (9.75, 10.73) | 11786 (10927, 12434) | 13.40 (12.44, 14.13) | 0.96 (0.73, 1.19) | 0.10(0.09,0.11) | 14500 (13769, 15140) | 32.07 (30.48, 33.47) | 46582 (43524, 49155) | 53.25 (49.78, 56.18) | 1.77 (1.60, 1.93) | 0.68(0.64,0.72) | 35340 (33554, 36812) | 77.67 (73.82, 80.88) | 68099 (63452, 71945) | 77.61 (72.38, 81.96) | 0.11 (-0.20, 0.42) | 0.00(-0.06,0.06) | 1581 (1484, 1646) | 3.41 (3.21, 3.55) | 3086 (2840, 3264) | 3.47 (3.20, 3.67) | 0.16 (-0.14, 0.46) | 0.00(0.00,0.01) |
| 21 | North Africa and Middle East | 286 (238, 351) | 1.53 (1.26, 1.88) | 879 (717, 1074) | 1.73 (1.41, 2.12) | 0.48 (0.44, 0.53) | 0.01(0.01,0.01) | 176 (147, 215) | 0.92 (0.76, 1.13) | 805 (654, 985) | 1.51 (1.23, 1.85) | 1.71 (1.60, 1.83) | 0.02(0.02,0.02) | 5903 (4900, 7265) | 30.02 (24.82, 37.04) | 13933 (11378, 17119) | 26.61 (21.71, 32.60) | -0.34 (-0.37, -0.31) | -0.11(-0.12,-0.11) | 271 (224, 334) | 1.51 (1.24, 1.87) | 659 (537, 806) | 1.36 (1.10, 1.66) | -0.26 (-0.30, -0.23) | -0.00(-0.00,-0.00) |
| 22 | Oceania | 2 (1, 3) | 0.63 (0.46, 0.87) | 5 (4, 7) | 0.65 (0.48, 0.88) | 0.29 (0.18, 0.41) | 0.00(0.00,0.00) | 1 (1, 1) | 0.36 (0.26, 0.49) | 3 (2, 4) | 0.37 (0.28, 0.51) | 0.38 (0.26, 0.49) | 0.00(0.00,0.00) | 40 (29, 56) | 12.73 (9.21, 17.73) | 99 (72, 139) | 12.73 (9.29, 17.70) | 0.22 (0.10, 0.34) | 0.00(-0.01,0.01) | 2 (1, 3) | 0.65 (0.48, 0.90) | 5 (3, 6) | 0.65 (0.48, 0.90) | 0.21 (0.10, 0.33) | 0.00(-0.00,0.00) |
| 23 | South Asia | 8449 (6951, 10204) | 12.46 (10.21, 15.09) | 31159 (26897, 35697) | 17.11 (14.77, 19.60) | 1.01 (0.92, 1.11) | 0.16(0.15,0.17) | 4848 (3999, 5842) | 7.07 (5.81, 8.54) | 20049 (17312, 22971) | 10.87 (9.39, 12.45) | 1.35 (1.22, 1.49) | 0.13(0.12,0.13) | 200466 (164848, 242386) | 284.74 (233.40, 344.90) | 639569 (549852, 732898) | 343.40 (295.36, 393.52) | 0.60 (0.52, 0.67) | 2.19(1.96,2.42) | 8368 (6857, 10152) | 12.62 (10.29, 15.35) | 28108 (24205, 32208) | 15.73 (13.55, 18.03) | 0.72 (0.65, 0.78) | 0.11(0.10,0.12) |
| 24 | Southeast Asia | 1170 (944, 1457) | 4.02 (3.25, 5.01) | 3680 (2911, 4694) | 4.64 (3.69, 5.90) | 0.26 (0.15, 0.37) | 0.02(0.02,0.02) | 705 (569, 882) | 2.38 (1.92, 2.98) | 2866 (2240, 3688) | 3.49 (2.74, 4.48) | 1.02 (0.85, 1.19) | 0.04(0.03,0.04) | 25156 (20293, 31377) | 83.17 (67.18, 103.75) | 66048 (52358, 84323) | 80.69 (64.29, 102.66) | -0.31 (-0.42, -0.21) | -0.08(-0.10,-0.07) | 1114 (900, 1388) | 3.94 (3.18, 4.92) | 2969 (2372, 3767) | 3.88 (3.11, 4.90) | -0.24 (-0.33, -0.16) | -0.00(-0.00,-0.00) |
| 25 | Southern Latin America | 311 (264, 366) | 5.24 (4.44, 6.17) | 338 (277, 407) | 3.02 (2.48, 3.63) | -1.40 (-1.77, -1.02) | -0.07(-0.07,-0.06) | 211 (179, 248) | 3.53 (2.98, 4.14) | 346 (285, 417) | 3.12 (2.57, 3.76) | -0.07 (-0.47, 0.32) | -0.01(-0.02,-0.00) | 5935 (5003, 6988) | 98.83 (83.31, 116.35) | 4938 (4041, 5949) | 44.33 (36.30, 53.38) | -2.18 (-2.55, -1.81) | -1.74(-1.89,-1.60) | 268 (227, 315) | 4.58 (3.87, 5.38) | 237 (193, 286) | 2.10 (1.71, 2.53) | -2.06 (-2.45, -1.67) | -0.08(-0.08,-0.07) |
| 26 | Southern Sub-Saharan Africa | 78 (62, 99) | 2.42 (1.92, 3.07) | 235 (196, 273) | 3.33 (2.77, 3.87) | 1.16 (1.00, 1.33) | 0.03(0.03,0.03) | 47 (37, 59) | 1.43 (1.14, 1.82) | 153 (127, 179) | 2.13 (1.77, 2.48) | 1.41 (1.31, 1.52) | 0.02(0.02,0.02) | 1687 (1343, 2160) | 50.98 (40.54, 65.15) | 4835 (4060, 5631) | 66.47 (55.75, 77.30) | 0.99 (0.77, 1.21) | 0.48(0.44,0.53) | 74 (59, 95) | 2.35 (1.87, 2.99) | 208 (174, 241) | 3.02 (2.52, 3.50) | 0.93 (0.72, 1.13) | 0.02(0.02,0.03) |
| 27 | Tropical Latin America | 884 (803, 966) | 8.20 (7.43, 8.97) | 2776 (2495, 3065) | 8.54 (7.66, 9.43) | 0.08 (-0.01, 0.18) | 0.02(0.01,0.03) | 536 (487, 585) | 4.90 (4.45, 5.35) | 2058 (1850, 2275) | 6.28 (5.64, 6.94) | 0.71 (0.61, 0.82) | 0.05(0.04,0.05) | 18663 (16970, 20407) | 167.74 (152.27, 183.42) | 50461 (45564, 55392) | 153.75 (138.71, 168.81) | -0.35 (-0.45, -0.24) | -0.45(-0.66,-0.23) | 835 (758, 912) | 7.94 (7.19, 8.68) | 2277 (2042, 2508) | 7.06 (6.33, 7.78) | -0.38 (-0.48, -0.28) | -0.02(-0.03,-0.01) |
| 28 | Western Europe | 6247 (5699, 6853) | 8.36 (7.62, 9.18) | 15982 (14127, 17858) | 14.25 (12.64, 15.93) | 1.76 (1.62, 1.89) | 0.19(0.17,0.21) | 8083 (7353, 8909) | 10.99 (9.99, 12.12) | 40252 (35745, 45293) | 37.53 (33.40, 42.22) | 4.25 (4.03, 4.47) | 0.86(0.81,0.91) | 85832 (78567, 93553) | 115.93 (106.05, 126.45) | 142916 (126628, 159316) | 129.44 (114.96, 144.33) | 0.26 (0.10, 0.42) | 0.40(0.25,0.56) | 3850 (3517, 4189) | 5.11 (4.66, 5.57) | 6757 (5948, 7529) | 5.75 (5.09, 6.41) | 0.31 (0.14, 0.47) | 0.02(0.01,0.03) |
| 29 | Western Sub-Saharan Africa | 50 (40, 62) | 0.50 (0.40, 0.63) | 106 (84, 130) | 0.52 (0.42, 0.65) | 0.21 (0.13, 0.29) | 0.00(0.00,0.00) | 28 (22, 35) | 0.28 (0.22, 0.35) | 60 (48, 75) | 0.29 (0.24, 0.36) | 0.27 (0.19, 0.35) | 0.00(0.00,0.00) | 1099 (876, 1375) | 10.66 (8.50, 13.41) | 2171 (1724, 2692) | 10.31 (8.24, 12.77) | -0.07 (-0.15, 0.01) | -0.01(-0.01,-0.01) | 52 (42, 65) | 0.53 (0.43, 0.67) | 107 (86, 132) | 0.54 (0.44, 0.67) | 0.15 (0.07, 0.24) | 0.00(0.00,0.00) |

**TableS3 Frontier of Geriatric HNC-related DALYs and effective difference by country (TOP15)**

|  | location_name | Age-standardized DALYs | SDI | frontier | Effective difference |
| --- | --- | --- | --- | --- | --- |
| Total |  |  |  |  |  |
| 1 | Pakistan | 2473.22 | 0.50 | 100.61 | 2372.61 |
| 2 | Seychelles | 1569.66 | 0.73 | 100.56 | 1469.10 |
| 3 | Palau | 1421.74 | 0.75 | 100.38 | 1321.36 |
| 4 | India | 1315.81 | 0.58 | 100.54 | 1215.27 |
| 5 | Bangladesh | 1147.70 | 0.49 | 100.64 | 1047.06 |
| 6 | Nepal | 1146.08 | 0.43 | 100.59 | 1045.49 |
| 7 | Greenland | 1145.30 | 0.83 | 100.68 | 1044.62 |
| 8 | Hungary | 1144.27 | 0.79 | 100.51 | 1043.76 |
| 9 | Cuba | 1095.93 | 0.67 | 100.42 | 995.51 |
| 10 | Bhutan | 1079.01 | 0.47 | 100.77 | 978.24 |
| 11 | Romania | 1005.97 | 0.77 | 100.42 | 905.55 |
| 12 | Northern Mariana Islands | 988.82 | 0.77 | 100.60 | 888.23 |
| 13 | Namibia | 978.64 | 0.62 | 100.51 | 878.13 |
| 14 | Uganda | 967.92 | 0.42 | 100.45 | 867.47 |
| 15 | Zambia | 954.24 | 0.51 | 100.54 | 853.70 |
| NPC |  |  |  |  |  |
| 1 | Malaysia | 377.44 | 0.74 | 0.12 | 377.32 |
| 2 | Greenland | 364.29 | 0.83 | 0.12 | 364.16 |
| 3 | Brunei Darussalam | 236.64 | 0.81 | 0.12 | 236.52 |
| 4 | Uganda | 219.63 | 0.42 | 0.52 | 219.11 |
| 5 | Singapore | 216.22 | 0.86 | 0.12 | 216.10 |
| 6 | Libya | 205.53 | 0.73 | 0.12 | 205.41 |
| 7 | Viet Nam | 204.93 | 0.63 | 0.12 | 204.81 |
| 8 | Cambodia | 182.89 | 0.47 | 0.14 | 182.75 |
| 9 | Zambia | 163.46 | 0.51 | 0.12 | 163.34 |
| 10 | Taiwan (Province of China) | 160.03 | 0.87 | 0.12 | 159.91 |
| 11 | Tunisia | 157.51 | 0.68 | 0.12 | 157.39 |
| 12 | Kenya | 156.19 | 0.52 | 0.12 | 156.07 |
| 13 | Algeria | 148.87 | 0.66 | 0.12 | 148.75 |
| 14 | Lao People's Democratic Republic | 144.29 | 0.49 | 0.12 | 144.17 |
| 15 | Northern Mariana Islands | 136.65 | 0.77 | 0.12 | 136.53 |
| OC |  |  |  |  |  |
| 1 | Pakistan | 1512.63 | 0.50 | 10.45 | 1502.18 |
| 2 | Palau | 1363.51 | 0.75 | 10.45 | 1353.06 |
| 3 | Northern Mariana Islands | 711.86 | 0.77 | 10.51 | 701.35 |
| 4 | Seychelles | 666.65 | 0.73 | 10.48 | 656.17 |
| 5 | India | 614.94 | 0.58 | 10.48 | 604.46 |
| 6 | Namibia | 533.98 | 0.62 | 10.46 | 523.52 |
| 7 | Nepal | 510.27 | 0.43 | 10.48 | 499.79 |
| 8 | Bangladesh | 504.95 | 0.49 | 10.46 | 494.49 |
| 9 | Sri Lanka | 498.01 | 0.70 | 10.48 | 487.54 |
| 10 | Bhutan | 485.02 | 0.47 | 10.46 | 474.56 |
| 11 | Taiwan (Province of China) | 484.29 | 0.87 | 10.45 | 473.84 |
| 12 | Zambia | 448.70 | 0.51 | 10.46 | 438.24 |
| 13 | Hungary | 445.41 | 0.79 | 10.45 | 434.97 |
| 14 | Kiribati | 414.84 | 0.53 | 10.47 | 404.37 |
| 15 | Kenya | 378.96 | 0.52 | 10.46 | 368.50 |
| LC |  |  |  |  |  |
| 1 | Cuba | 586.74 | 0.67 | 25.41 | 561.34 |
| 2 | Montenegro | 538.35 | 0.80 | 25.41 | 512.93 |
| 3 | Pakistan | 529.01 | 0.50 | 25.42 | 503.60 |
| 4 | Seychelles | 459.31 | 0.73 | 25.42 | 433.89 |
| 5 | Georgia | 379.52 | 0.73 | 25.41 | 354.11 |
| 6 | North Macedonia | 378.86 | 0.75 | 25.42 | 353.44 |
| 7 | Monaco | 374.74 | 0.91 | 25.41 | 349.33 |
| 8 | Bulgaria | 373.04 | 0.77 | 25.41 | 347.63 |
| 9 | Libya | 354.41 | 0.73 | 25.39 | 329.03 |
| 10 | Romania | 343.58 | 0.77 | 25.40 | 318.18 |
| 11 | Lesotho | 339.35 | 0.51 | 25.43 | 313.91 |
| 12 | Serbia | 336.25 | 0.79 | 25.41 | 310.84 |
| 13 | Hungary | 324.64 | 0.79 | 25.41 | 299.23 |
| 14 | Bosnia and Herzegovina | 324.45 | 0.72 | 25.41 | 299.04 |
| 15 | Poland | 320.34 | 0.81 | 25.41 | 294.93 |
| OPC |  |  |  |  |  |
| 1 | India | 349.33 | 0.58 | 0.87 | 348.46 |
| 2 | Hungary | 332.79 | 0.79 | 0.87 | 331.92 |
| 3 | Pakistan | 327.53 | 0.50 | 0.87 | 326.66 |
| 4 | Seychelles | 322.00 | 0.73 | 0.88 | 321.12 |
| 5 | Bangladesh | 313.39 | 0.49 | 0.88 | 312.51 |
| 6 | Bhutan | 297.34 | 0.47 | 0.90 | 296.44 |
| 7 | Nepal | 296.64 | 0.43 | 1.47 | 295.17 |
| 8 | Slovakia | 293.34 | 0.81 | 0.87 | 292.46 |
| 9 | Romania | 278.14 | 0.77 | 0.87 | 277.26 |
| 10 | Republic of Moldova | 277.56 | 0.73 | 0.87 | 276.69 |
| 11 | Belarus | 267.84 | 0.78 | 0.87 | 266.97 |
| 12 | Greenland | 266.77 | 0.83 | 0.88 | 265.90 |
| 13 | Lithuania | 261.23 | 0.86 | 0.88 | 260.35 |
| 14 | Slovenia | 252.10 | 0.84 | 0.88 | 251.22 |
| 15 | Croatia | 212.50 | 0.80 | 0.87 | 211.63 |


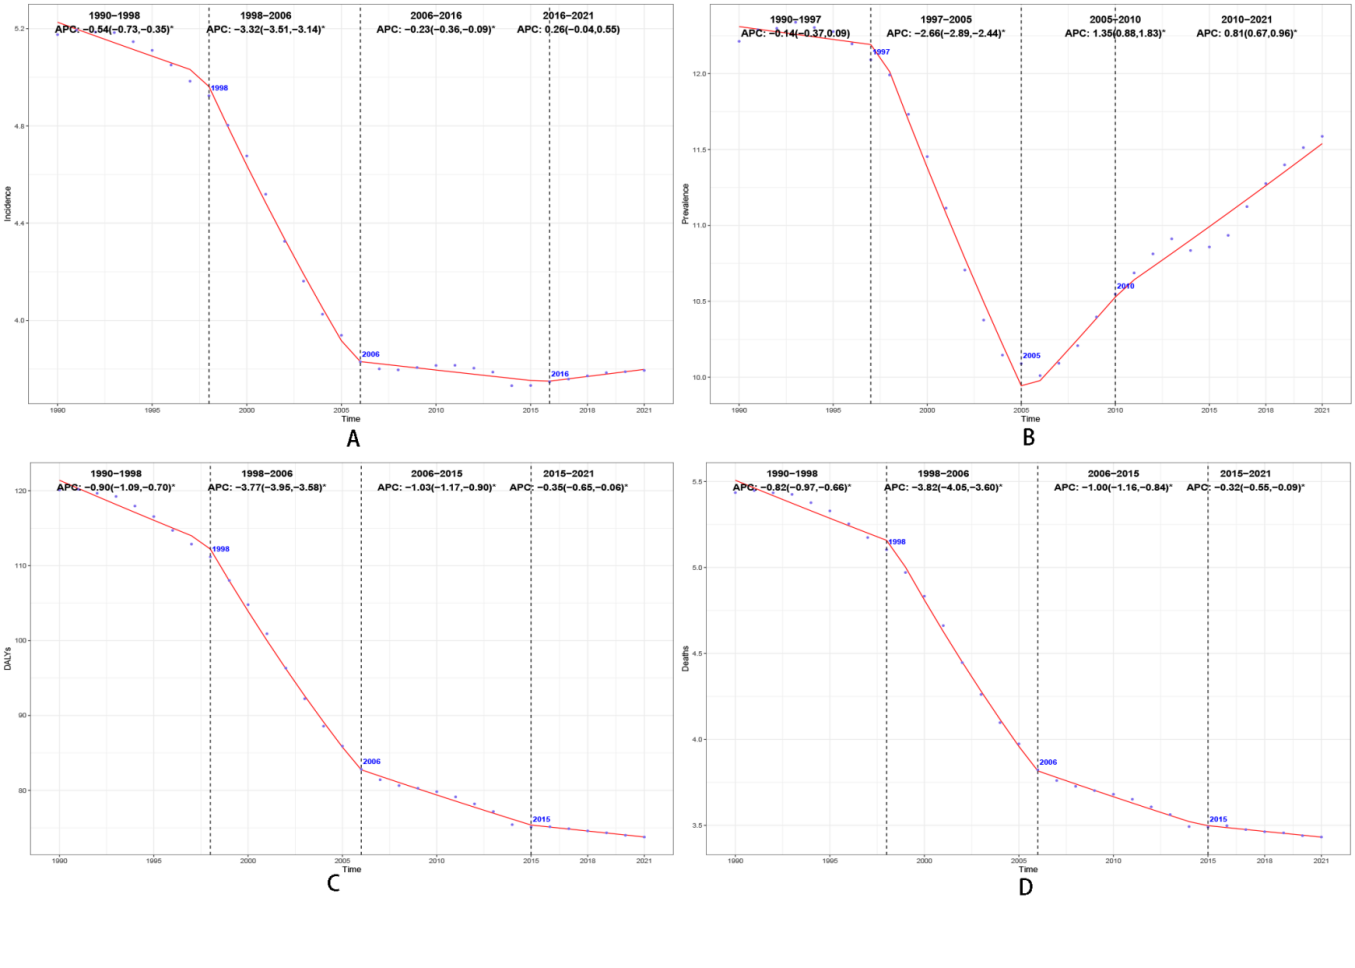


**Figure S1 Joinpoint regression plot of Geriatric NPC**

The incidence of nasopharyngeal cancer showed a significant decline over time, with an annual percentage change (APC) of −0.54 (−0.73, −0.35) from 1990 to 1998, followed by a sharper decrease of −3.32 (−3.51, −3.14) from 1998 to 2006. The decline continued with a rate of −0.23 (−0.36, −0.09) from 2006 to 2016, before stabilizing with an APC of 0.26 (−0.04, 0.55) from 2016 to 2021.


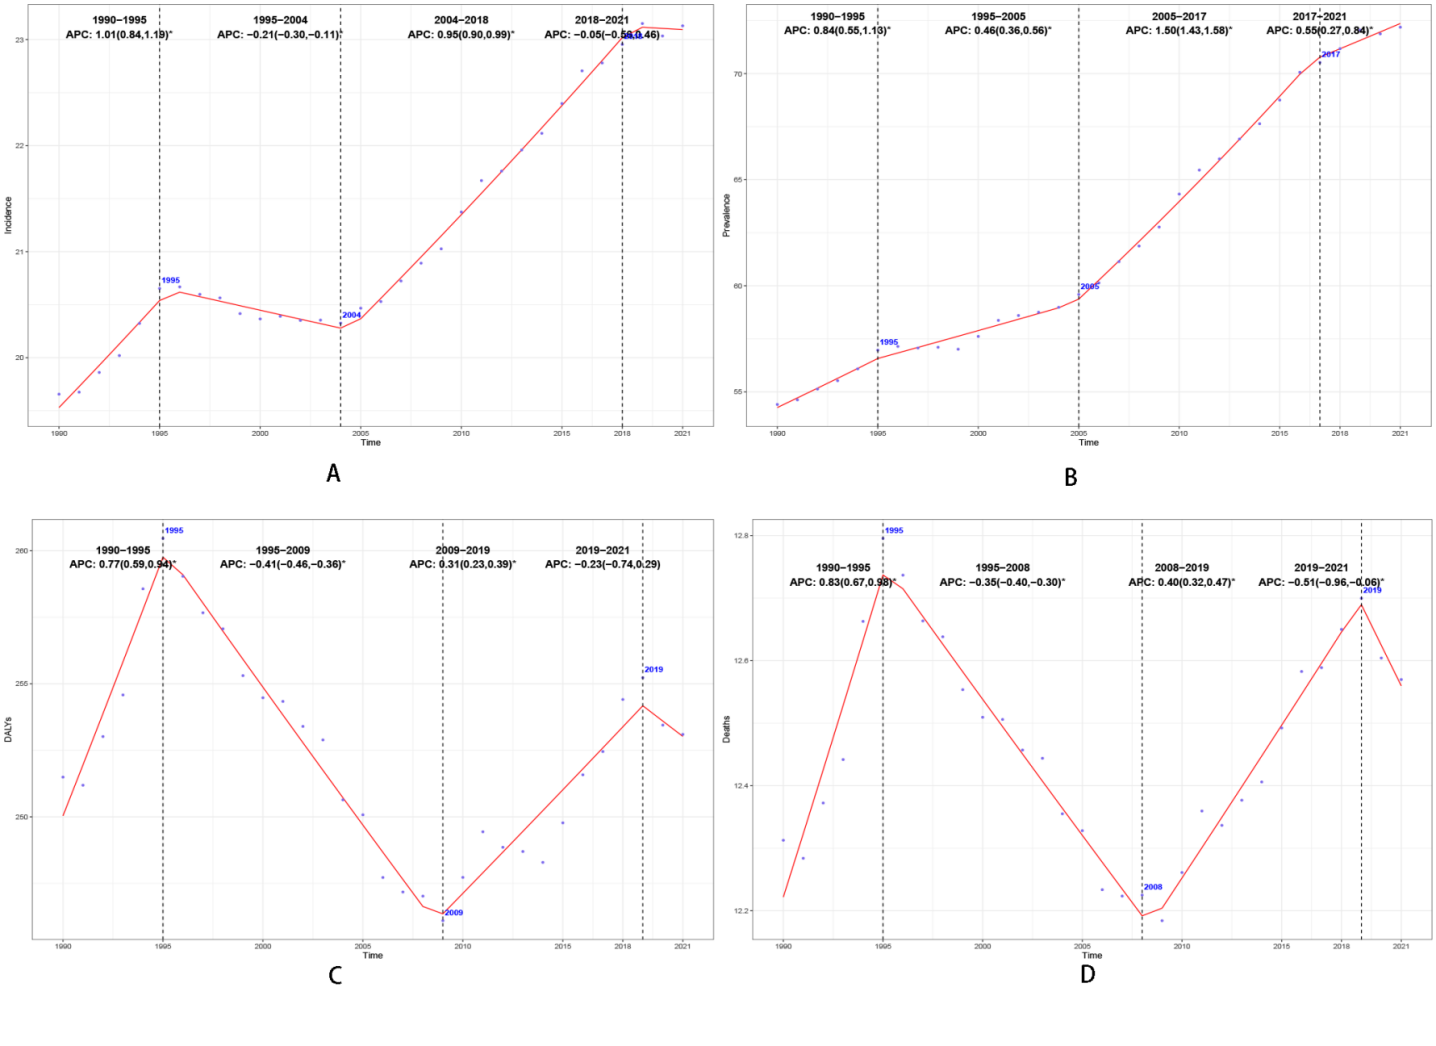


**Figure S2 Joinpoint regression plot of Geriatric Lip and oral cavity cancer**

The incidence of lip and oral cavity cancer showed a notable fluctuation, with an increase of 1.01 (0.84, 1.19) from 1990 to 1995, followed by a decline of −0.21 (−0.30, −0.11) from 1995 to 2004, and a subsequent rise of 0.95 (0.90, 0.99) from 2004 to 2018. However, the incidence showed a slight decrease of −0.05 (−0.56, 0.46) from 2018 to 2021.


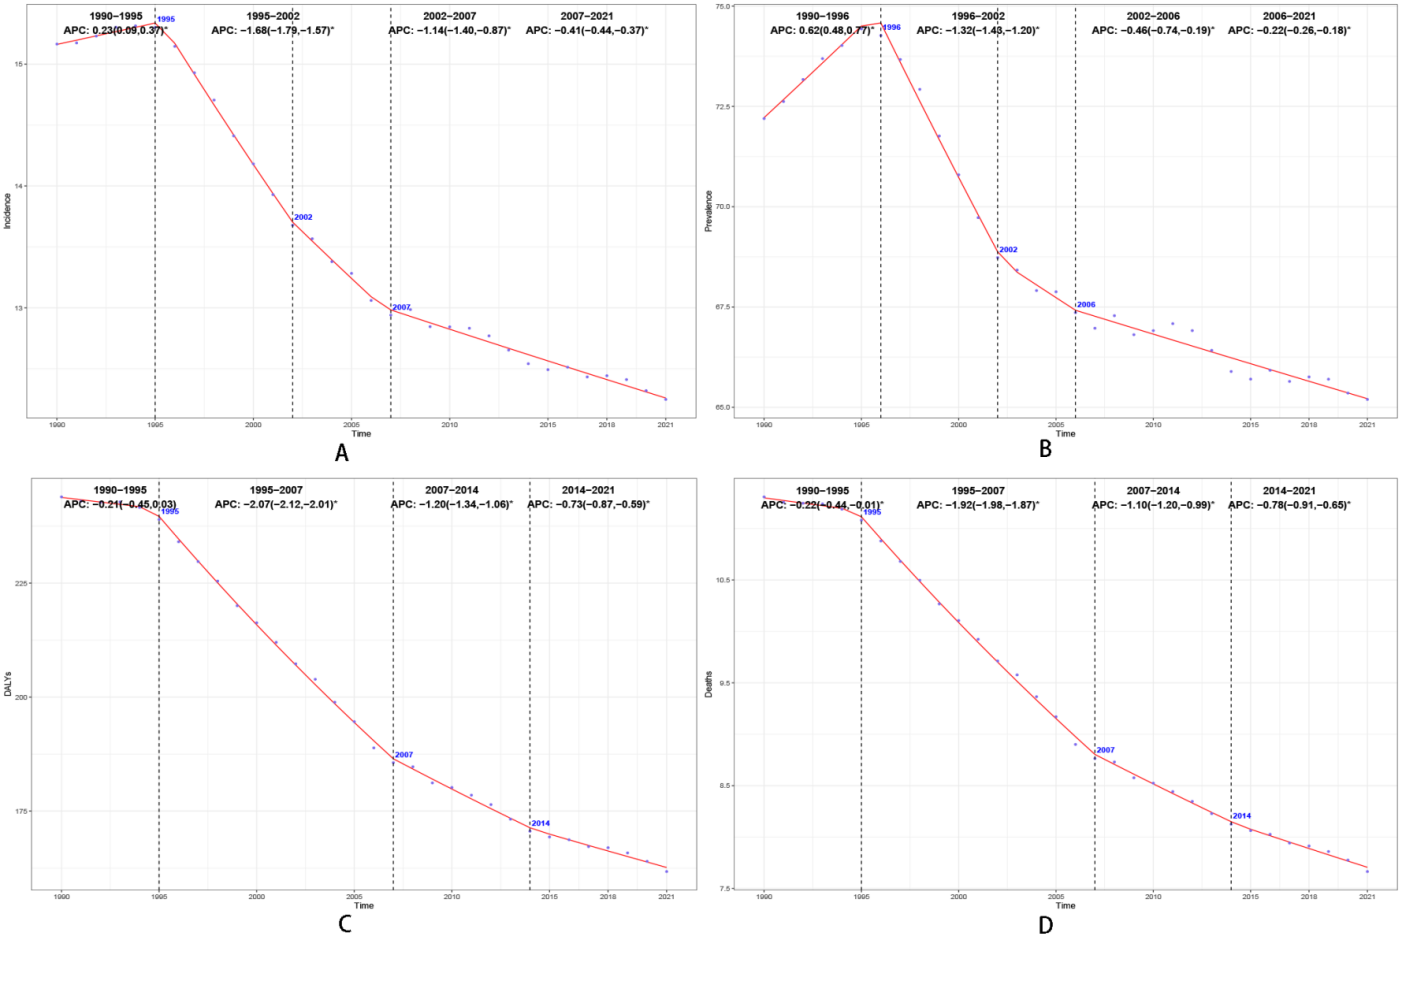


**Figure S3 Joinpoint regression plot of Geriatric Larynx cancer**

The incidence of larynx cancer exhibited a significant decline over time, with an annual percentage change (APC) of 0.23 (0.09, 0.37) from 1990 to 1995, followed by a sharp decrease of −1.68 (−1.79, −1.57) from 1995 to 2002, and a continued decline of −1.14 (−1.40, −0.87) from 2002 to 2007. The rate of decline slowed to −0.41 (−0.44, −0.37) from 2007 to 2021.


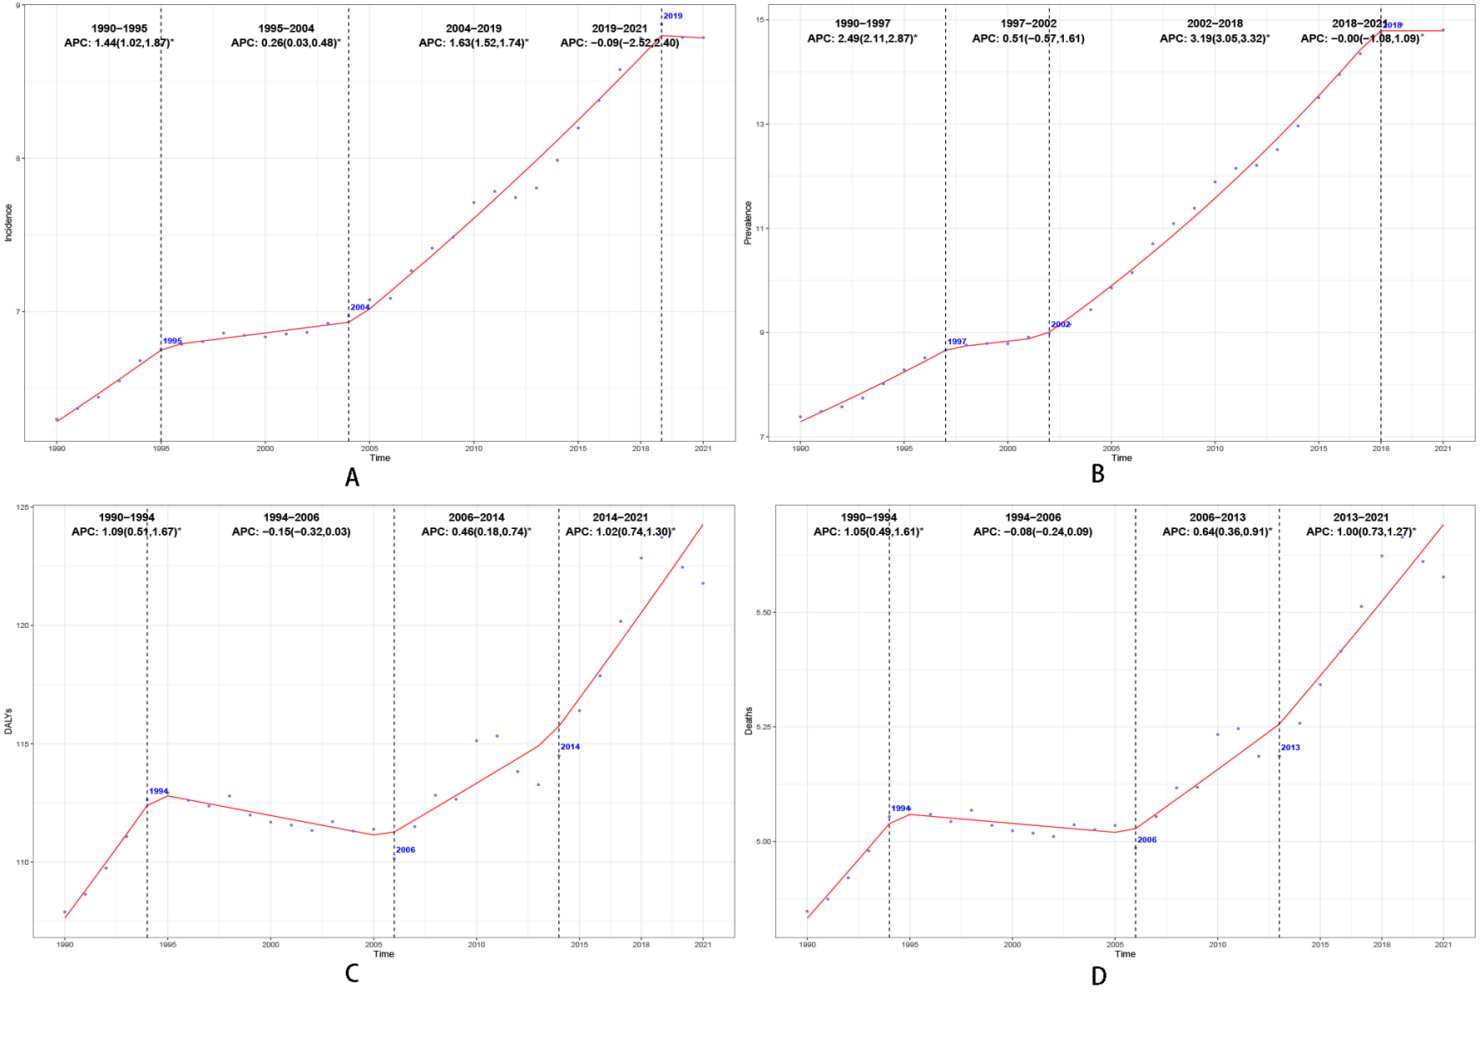


**Figure S4 Joinpoint regression plot of Geriatric Other pharynx cancer**

The incidence of other pharynx cancer exhibited an increasing trend, with an annual percentage change (APC) of 1.44 (1.02, 1.87) from 1990 to 1995, followed by a more moderate rise of 0.26 (0.03, 0.48) from 1995 to 2004. The incidence further accelerated with an APC of 1.63 (1.52, 1.74) from 2004 to 2019, before slightly decreasing with an APC of −0.09 (−2.52, 2.40) from 2019 to 2021.


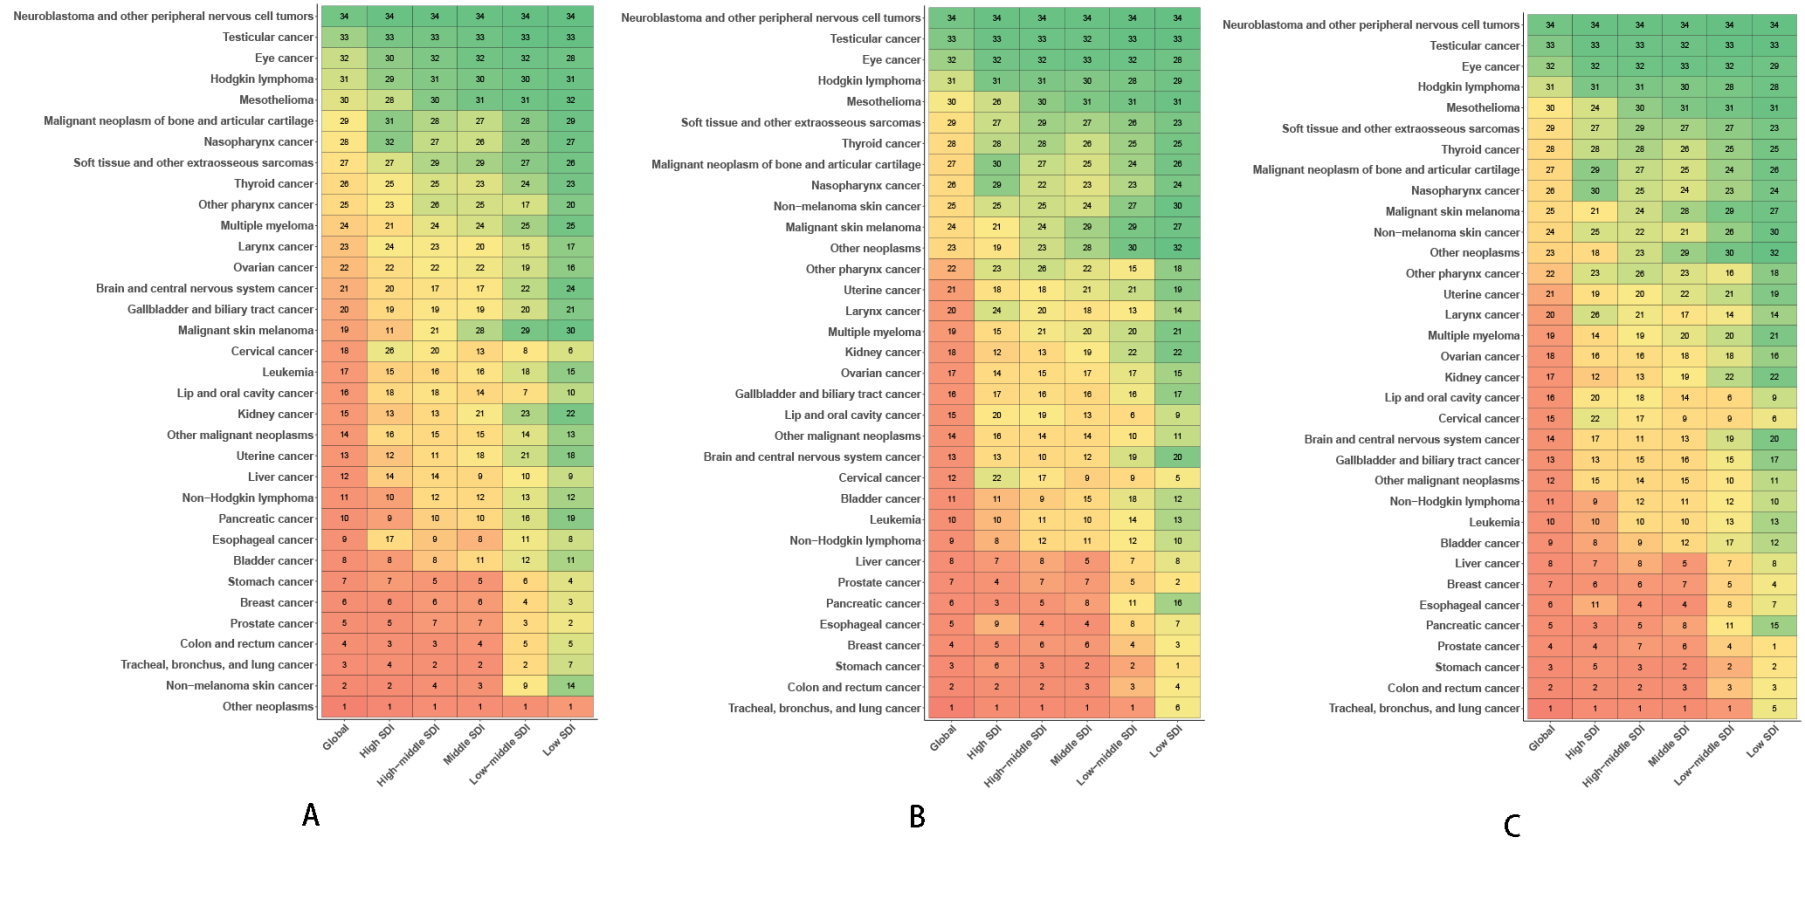


**Figure S5 Global ranking of absolute incidence(A) ,DALYs(B) and death(C) due to HNC compared to other cancers in the elder aged 60 and above in 2021 for both sexes combined.**


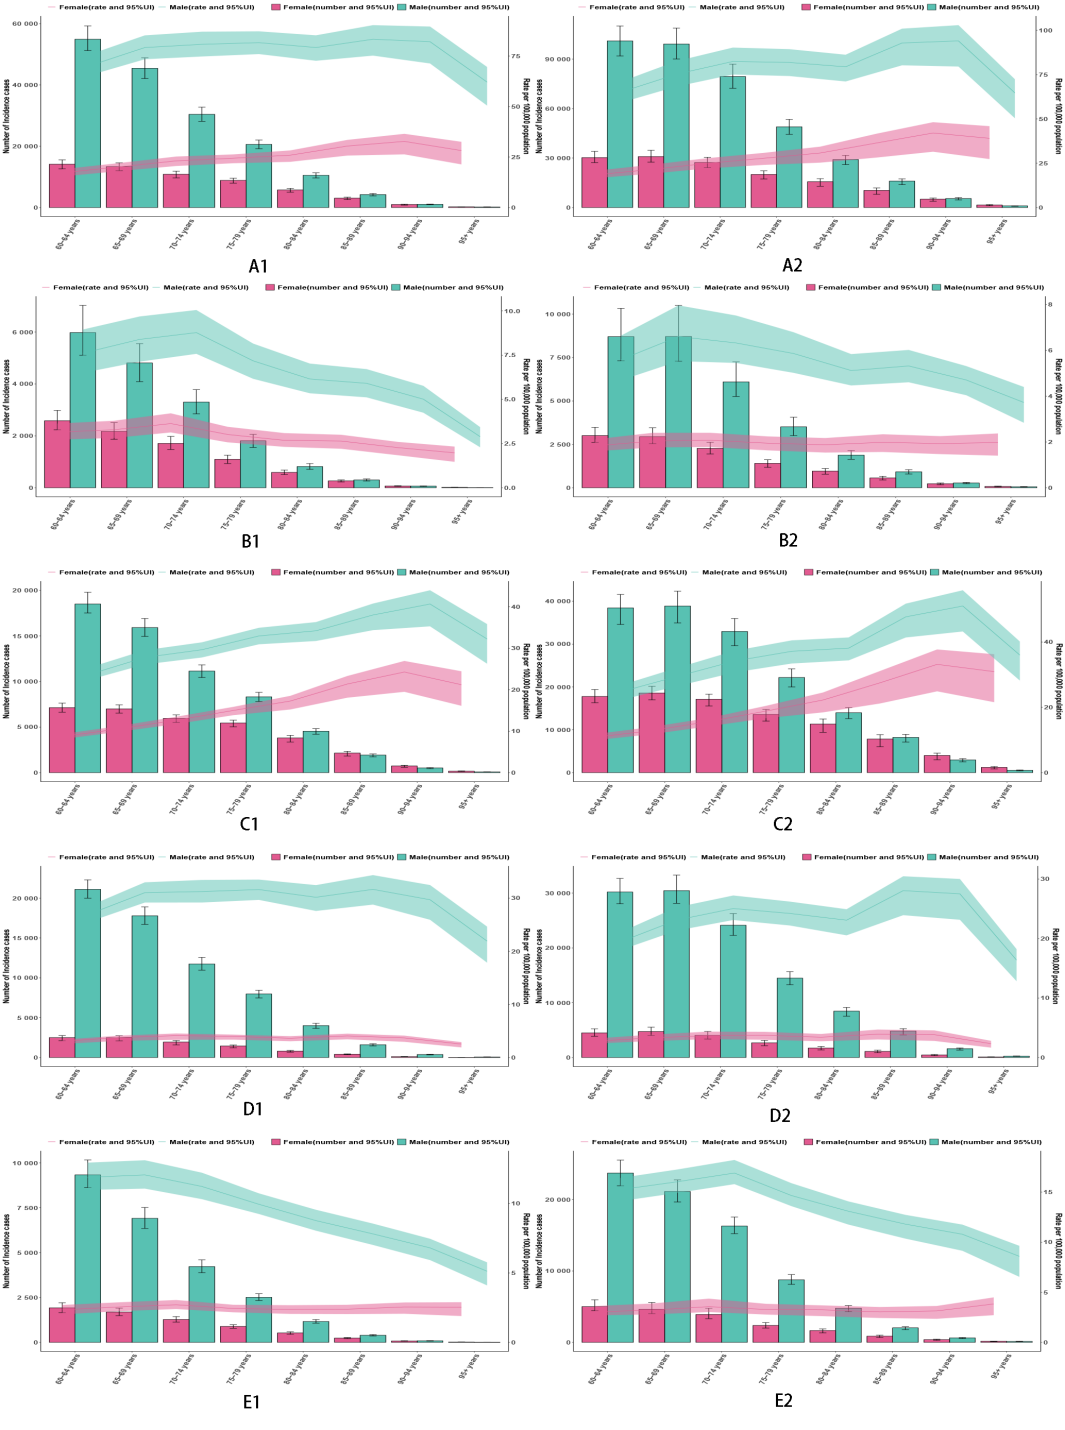


**Figure S6 Global counts and incidence rates of Geriatric HNC by age and sex,1990 and 2021**

Global counts and incidence (A1,A2) rates of Geriatric HNC by age and sex,1990 (A1) and 2021(A2)

Global counts and incidence (B1,B2) rates of Geriatric Nasopharynx cancer by age and sex,1990 (B1) and 2021(B2)

Global counts and incidence (C1,C2) rates of Geriatric Lip and oral cavity cancer by age and sex,1990 (C1) and 2021(C2)

Global counts and incidence (D1,D2) rates of Geriatric Larynx cancer by age and sex,1990 (D1) and 2021(D2)

Global counts and incidence (E1,E2) rates of Geriatric Other pharynx cancer by age and sex,1990 (E1) and 2021(E2)

Error bars indicate the 95% uncertainty intervals (95% UI) for incidence, death. Shading indicates the upper and lower limits of the 95% UI.


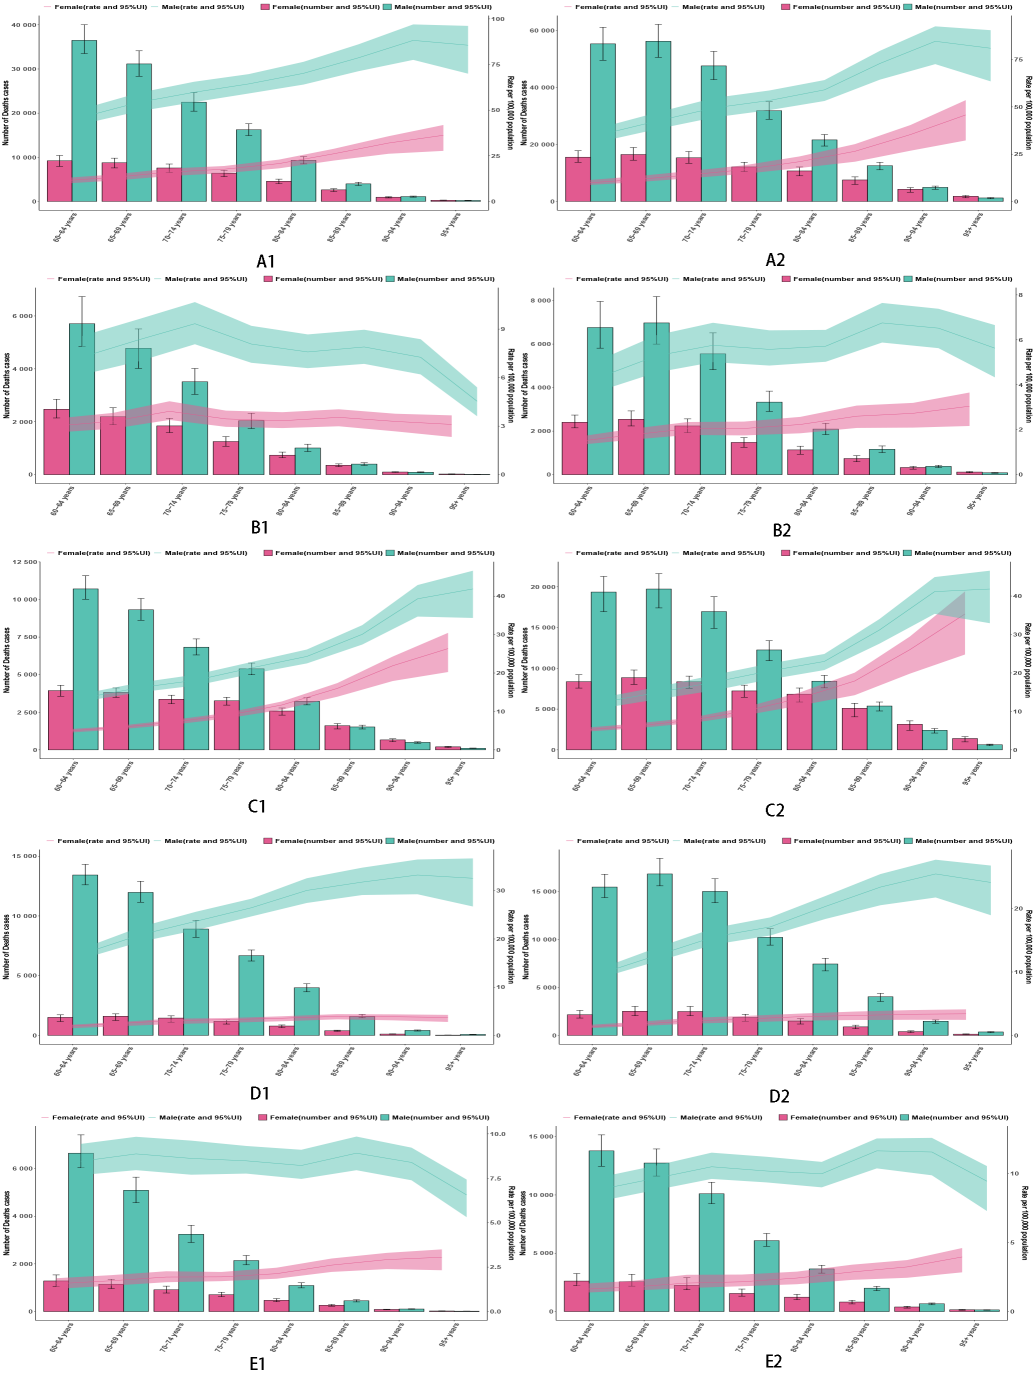


**Figure S7 Global counts and death rates of Geriatric HNC by age and sex,1990 and 2021**

Global counts and death (A1,A2) rates of Geriatric HNC by age and sex,1990 (A1) and 2021(A2)

Global counts and death (B1,B2) rates of Geriatric Nasopharynx cancer by age and sex,1990 (B1) and 2021(B2)

Global counts and death (C1,C2) rates of Geriatric Lip and oral cavity cancer by age and sex,1990 (C1) and 2021(C2)

Global counts and death (D1,D2) rates of Geriatric Larynx cancer by age and sex,1990 (D1) and 2021(D2)

Global counts and death (E1,E2) rates of Geriatric Other pharynx cancer by age and sex,1990 (E1) and 2021(E2)

Error bars indicate the 95% uncertainty intervals (95% UI) for incidence, death. Shading indicates the upper and lower limits of the 95% UI.


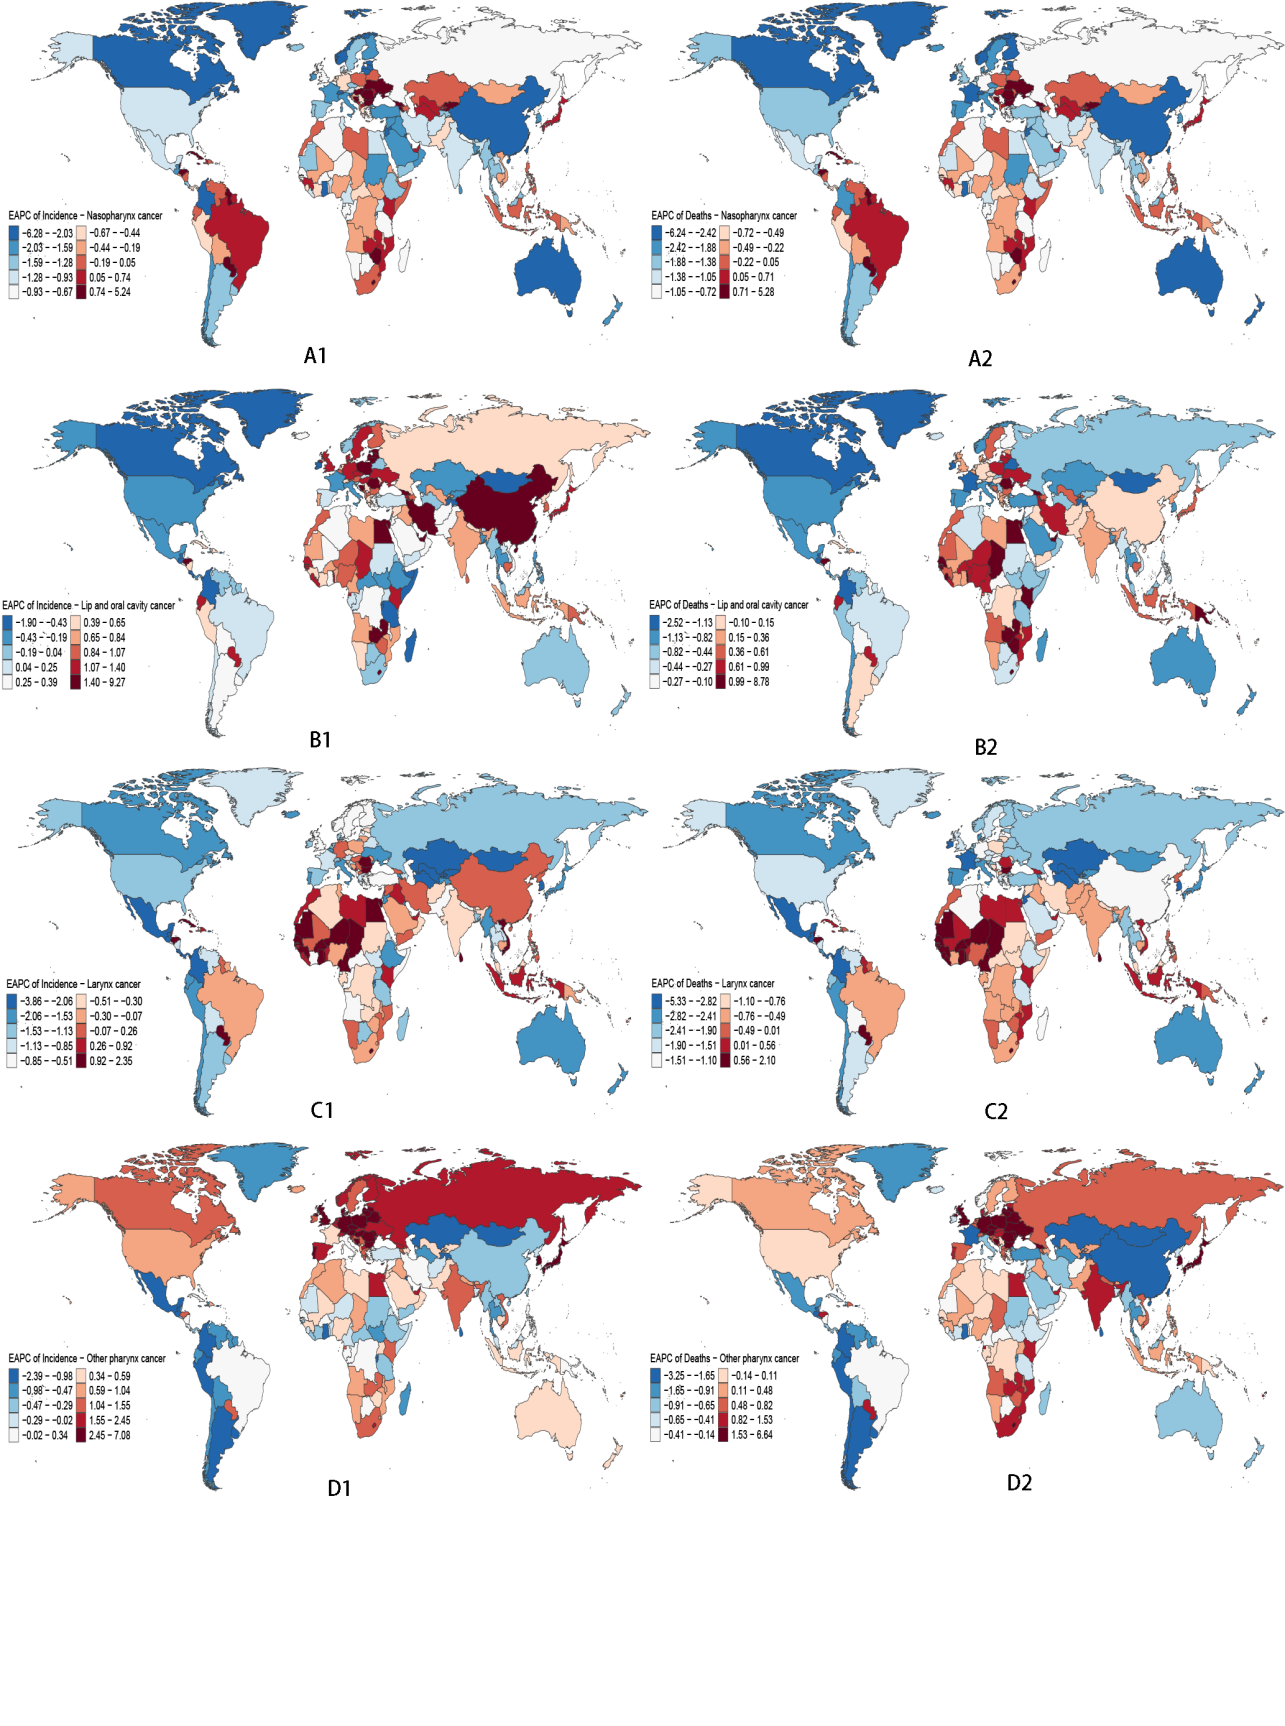


**Figure S8 Maps of EAPC in ASIR and ASMR in 2021 for Geriatric HNC.**

Darker red shades indicate higher ASRs, while blue shades represent lower ASRs.

A1:ASIR-EAPC for Geriatric Nasopharynx Cancer A2:ASMR-EAPC for Geriatric Nasopharynx Cancer;

B1:ASIR-EAPC for Geriatric Lip and Oral Cavity Cancer B2:ASMR-EAPC for Geriatric Lip and Oral Cavity Cancer;

C1:ASIR-EAPC for Geriatric Larynx Cancer C2:ASMR-EAPC for Geriatric Larynx Cancer;

D1:ASIR-EAPC for Geriatric Other Pharynx Cancer D2:ASMR-EAPC for Geriatric Other Pharynx Cancer


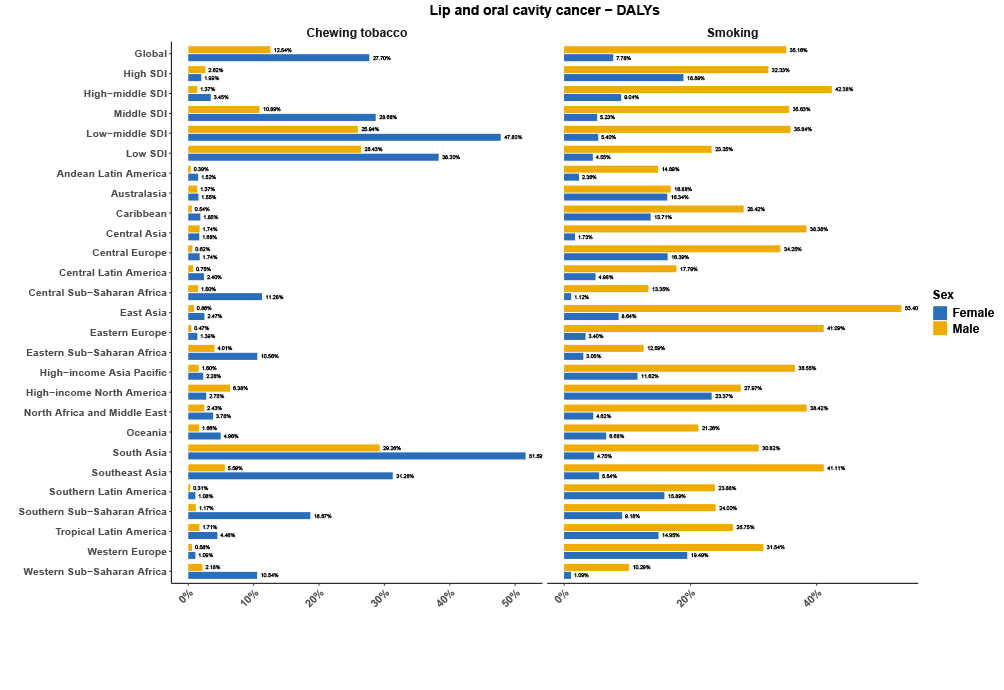


**FigureS9 Percentage Contribution of tobacco to DALYs for Geriatric lip and oral cavity cancer in 2021 by Global and Regional Distribution.**

Each bar represents the proportion of DALYs attributable to tobacco in the respective region. Regions are listed along the y-axis, with values presented as percentages on the x-axis.
